# Supplementary material
Source: PubMed Central journal article supplement (PMC6039237)
Supplement: NIHMS958872-supplement-1.pdf [file NIHMS958872-supplement-1.pdf]

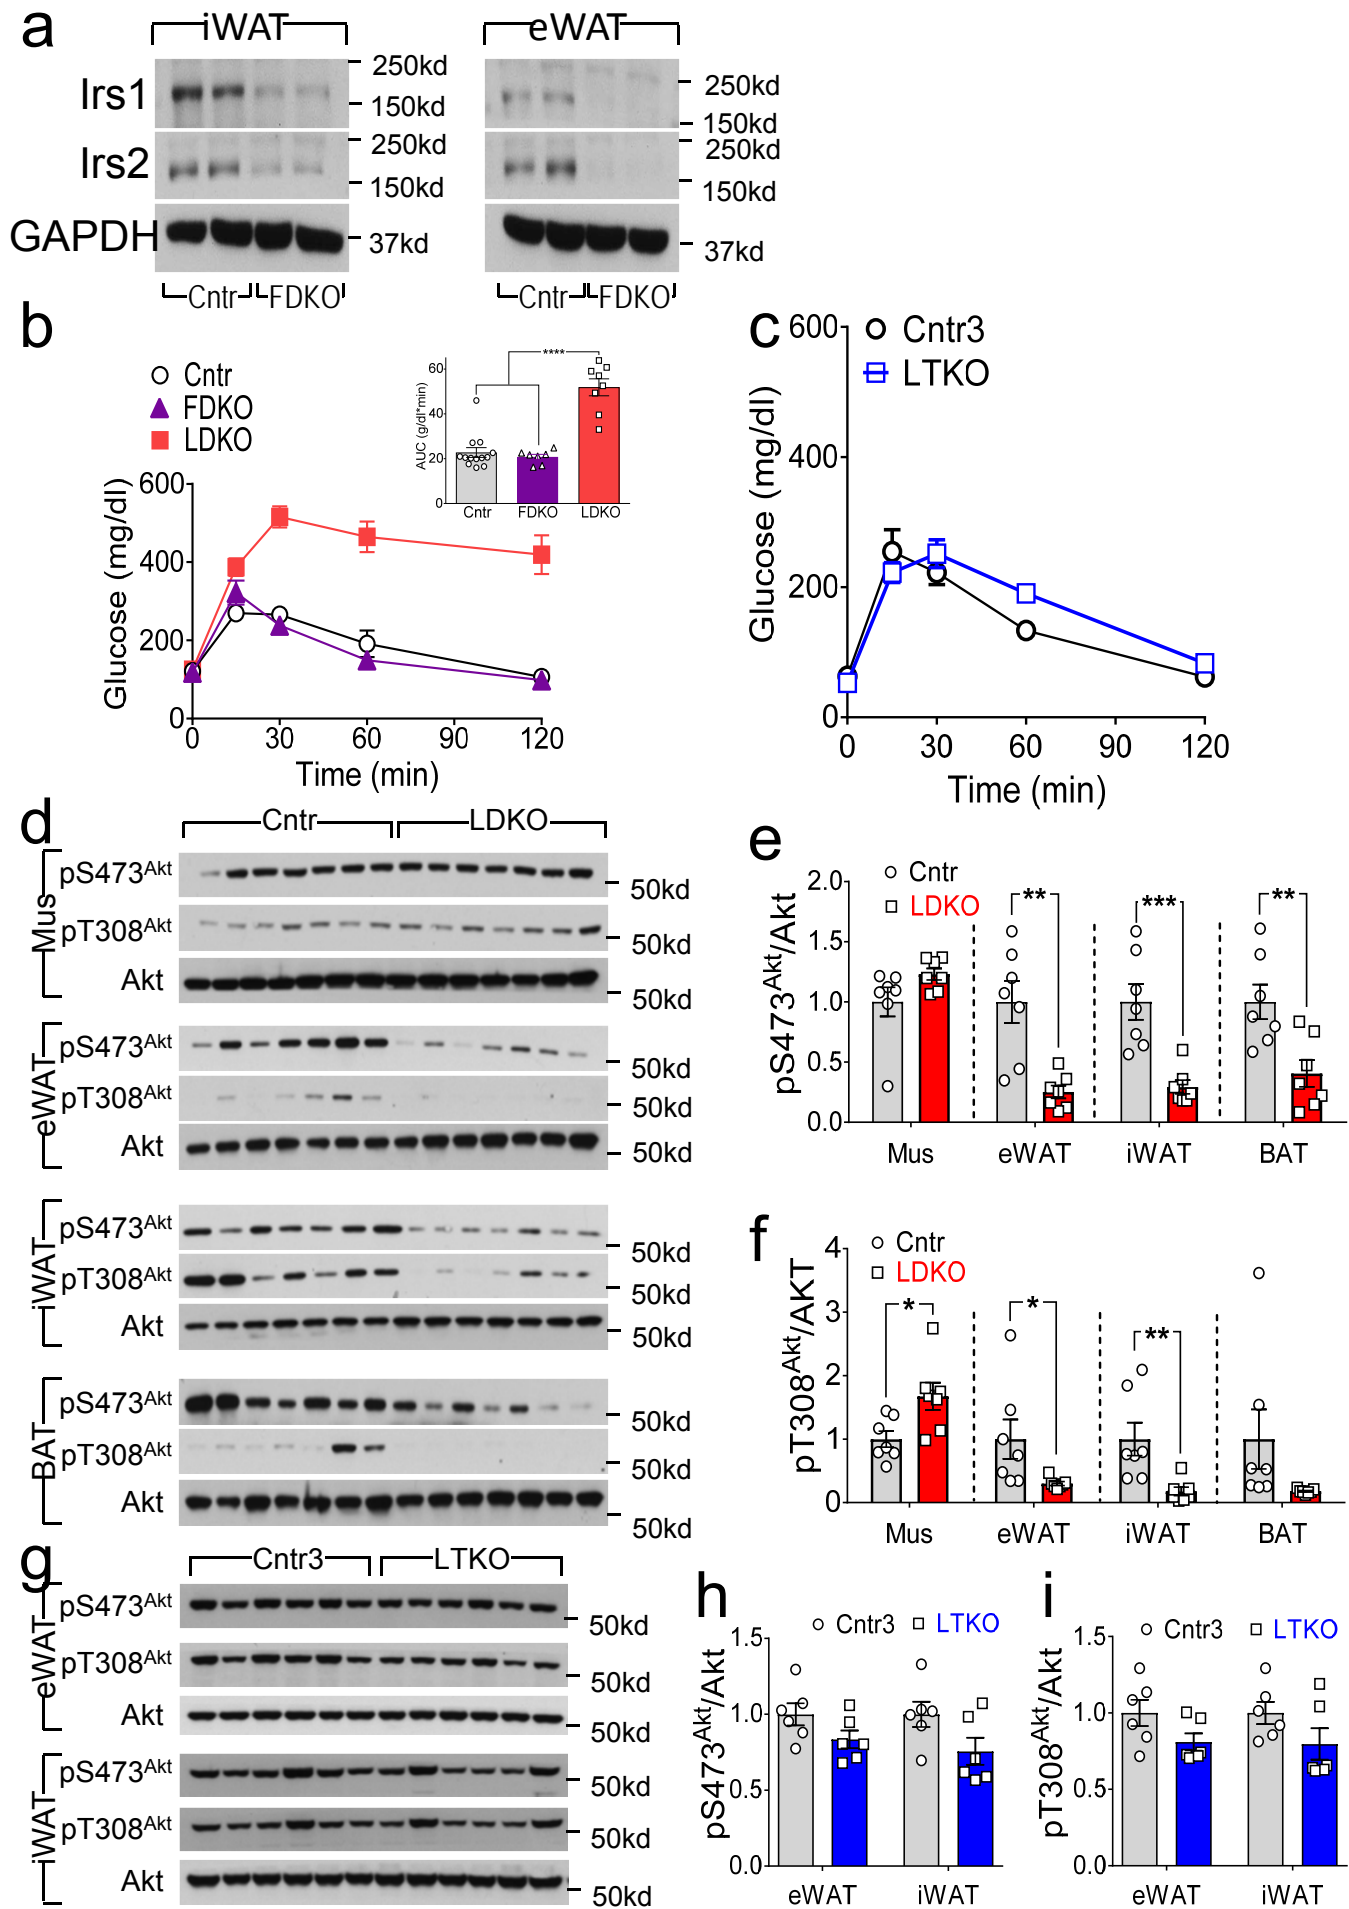

**Supplemental Fig. 1. Hepatic FoxO1 dysregulates WAT insulin signaling.** (a) Western blotting of Irs1 and Irs2 proteins in eWAT and iWAT depots of eight-week old FDKO and control (Cntr) mice. (b) Glucose tolerance test (GTT) performed on three-month old FDKO, LDKO and control mice ( $n = 7-13$ ). (c) GTT performed on 18-week old LTKO and control (Cntr3) mice ( $n = 5-8$ ). (d) Western blotting of phospho- and total Akt protein in hind-limb muscle, eWAT, iWAT and BAT upon completion of the hyperinsulinemic-euglycemic clamp in LDKO and Cntr mice. (e,f) Densitometric quantitation of (e) phospho-S473 and (f) phospho-T308, normalized by total Akt from Western blots of LDKO and control tissues. (g) Western blotting of phospho- and total Akt protein in eWAT and iWAT upon completion of the hyperinsulinemic-euglycemic clamp in LTKO and Cntr3 mice. (h,i) Densitometric quantitation of (h) phospho- S473 and (i) phospho-T308, normalized by total Akt from Western blots of LTKO and control tissues. Data were analyzed by two-way ANOVA (b, c) and unpaired Student's t-test (e, f, h, i). All data are presented as mean  $\pm$  SEM. \* $P < 0.05$ ; \*\* $P < 0.01$ ; \*\*\* $P < 0.001$ ; \*\*\*\* $P < 0.0001$ .

---

# Supplemental Figure 2

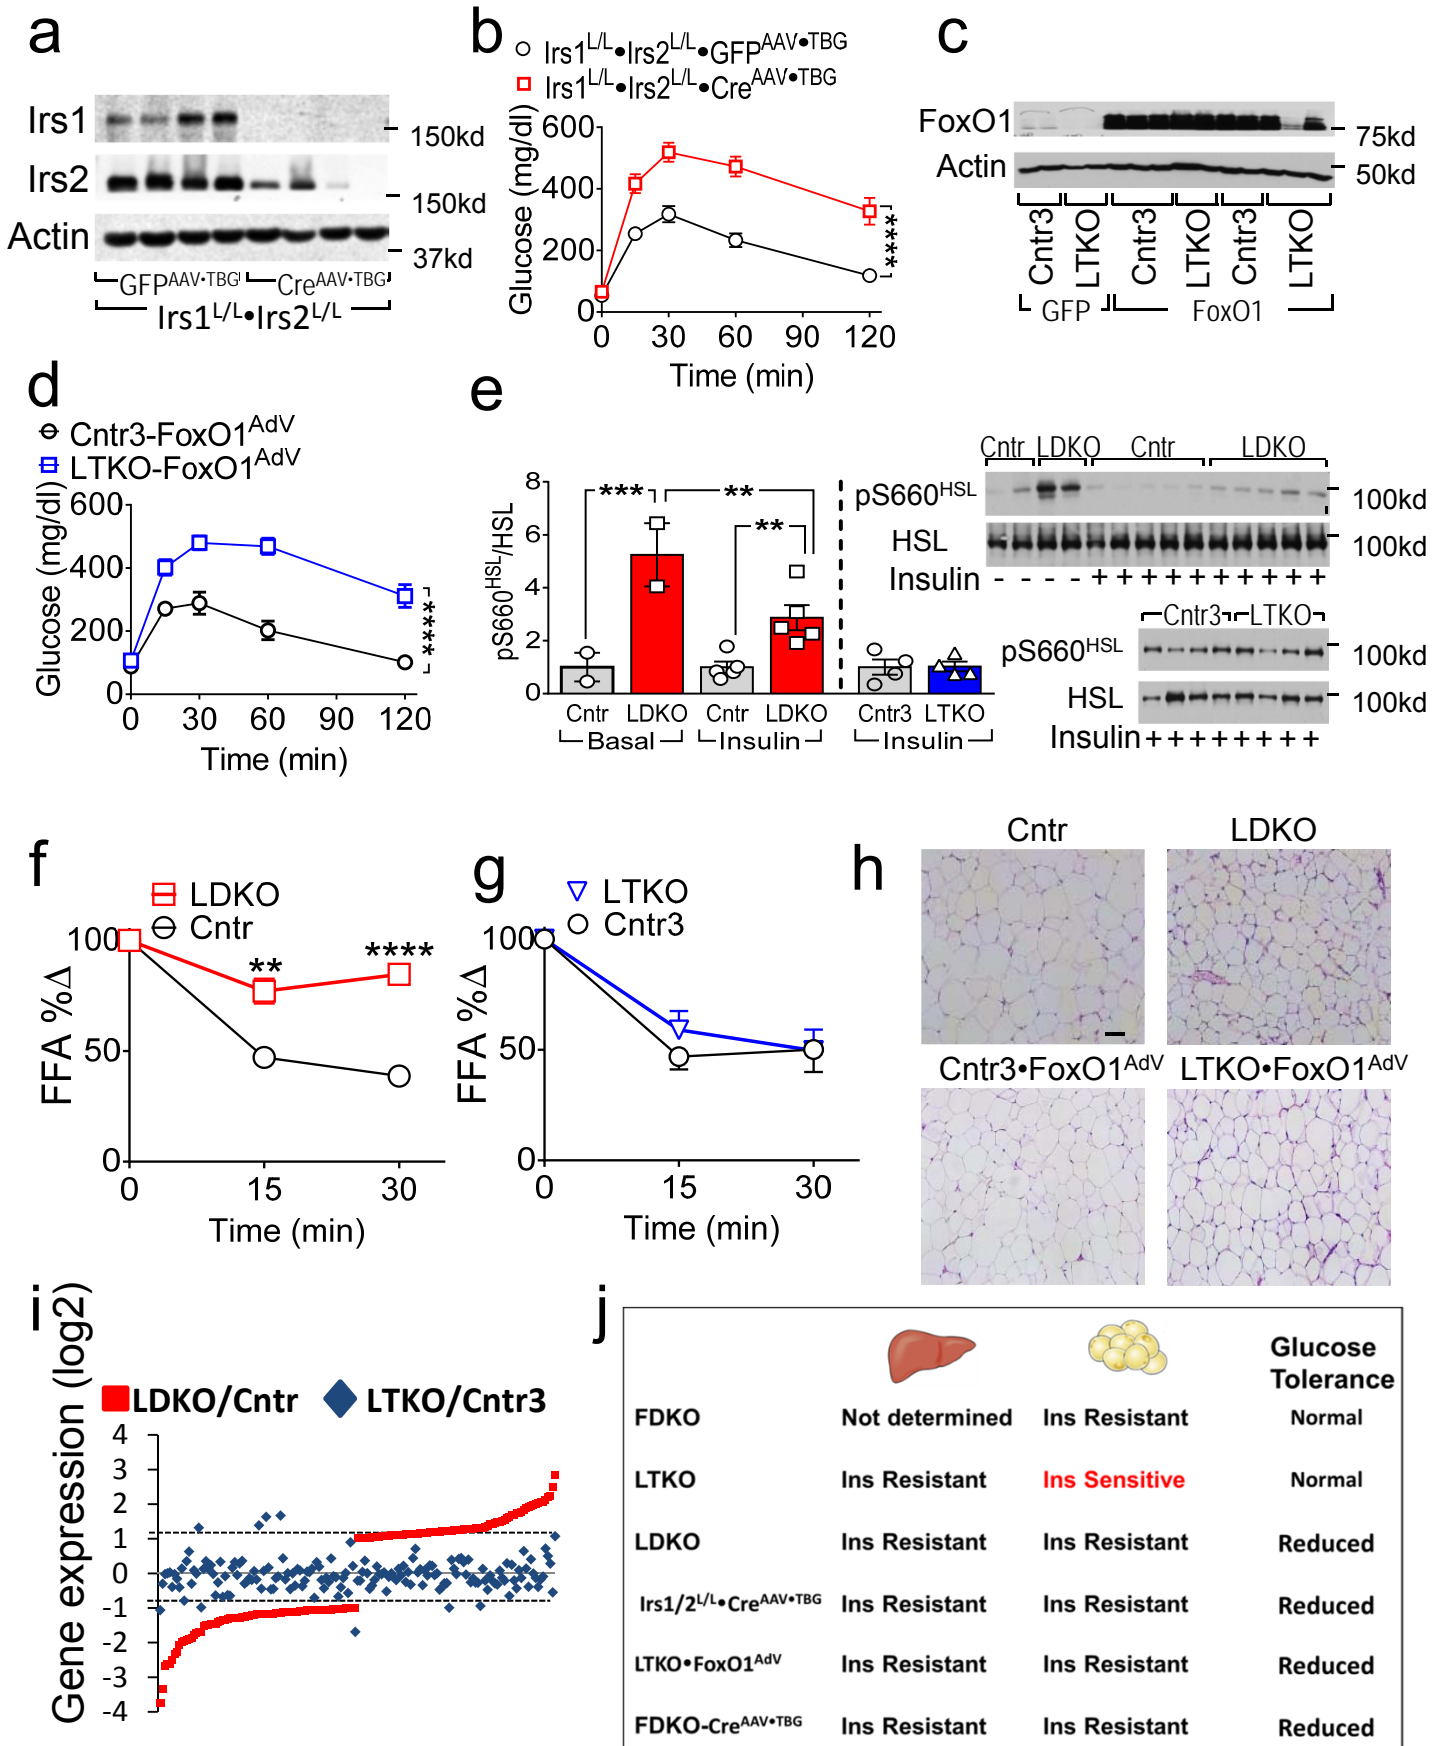

**Supplemental Fig. 2.** Related to Figure 1. **(a)** Western blot analysis of Irs1 and Irs2 proteins in liver of three-month old Irs1/2<sup>L/L</sup> mice three weeks after injection with Cre<sup>AAV+TBG</sup> or control GFP<sup>AAV+TBG</sup>. **(b)** GTTs performed on mice in 'a' two weeks after AAV infection ( $n = 5-6$ ). **(c)** Western blot analysis of FoxO1 in the liver extracts from eighteen-week old LTKO and Cntr3 mice two weeks after injection with FoxO1<sup>AdV</sup> or control GFP<sup>AdV</sup>. **(d)** GTTs performed on mice in 'c' one week after AAV infection ( $n = 5$ ). **(e)** Western blot and densitometric quantitation of pS660<sup>HSL</sup> in eWAT of four-month old LDKO and LTKO mice five minutes after injection with insulin (+) (1U/kg i.v.) or saline (-). **(f,g)** Change in serum free fatty acids (% of overnight-fasted baseline) following insulin treatment (1 U/kg, i.p.) of four-month old **(f)** LDKO and Cntr mice ( $n = 7$ ) or **(g)** LTKO and Cntr3 mice ( $n = 5-9$ ). **(h)** H&E staining of paraffin-sectioned eWAT from four-month old LDKO and Cntr mice and from eighteen-week old LTKO and Cntr3 mice two weeks after injection with FoxO1<sup>AdV</sup>. Scale bar, 50  $\mu\text{m}$ . **(i)** Differential/restored expression in eWAT of LTKO (versus Cntr3) mice of  $\sim 160$  genes that were up- or down-regulated  $\geq 2$ -fold in eWAT of LDKO (versus Cntr) mice. The results for each gene may be found in **Supplemental Table 1**. **(j)** Summary of hepatic and WAT insulin sensitivity and associated glucose tolerance of mice shown in **Figure 1** and **Supplemental Figure 1** and **2**. Data were analyzed by two-way ANOVA **(b, d, f, g)** and one-way ANOVA **(e)**. All data are presented as mean  $\pm$  SEM. \* $P < 0.05$ ; \*\* $P < 0.01$ ; \*\*\* $P < 0.001$ ; \*\*\*\* $P < 0.0001$ .

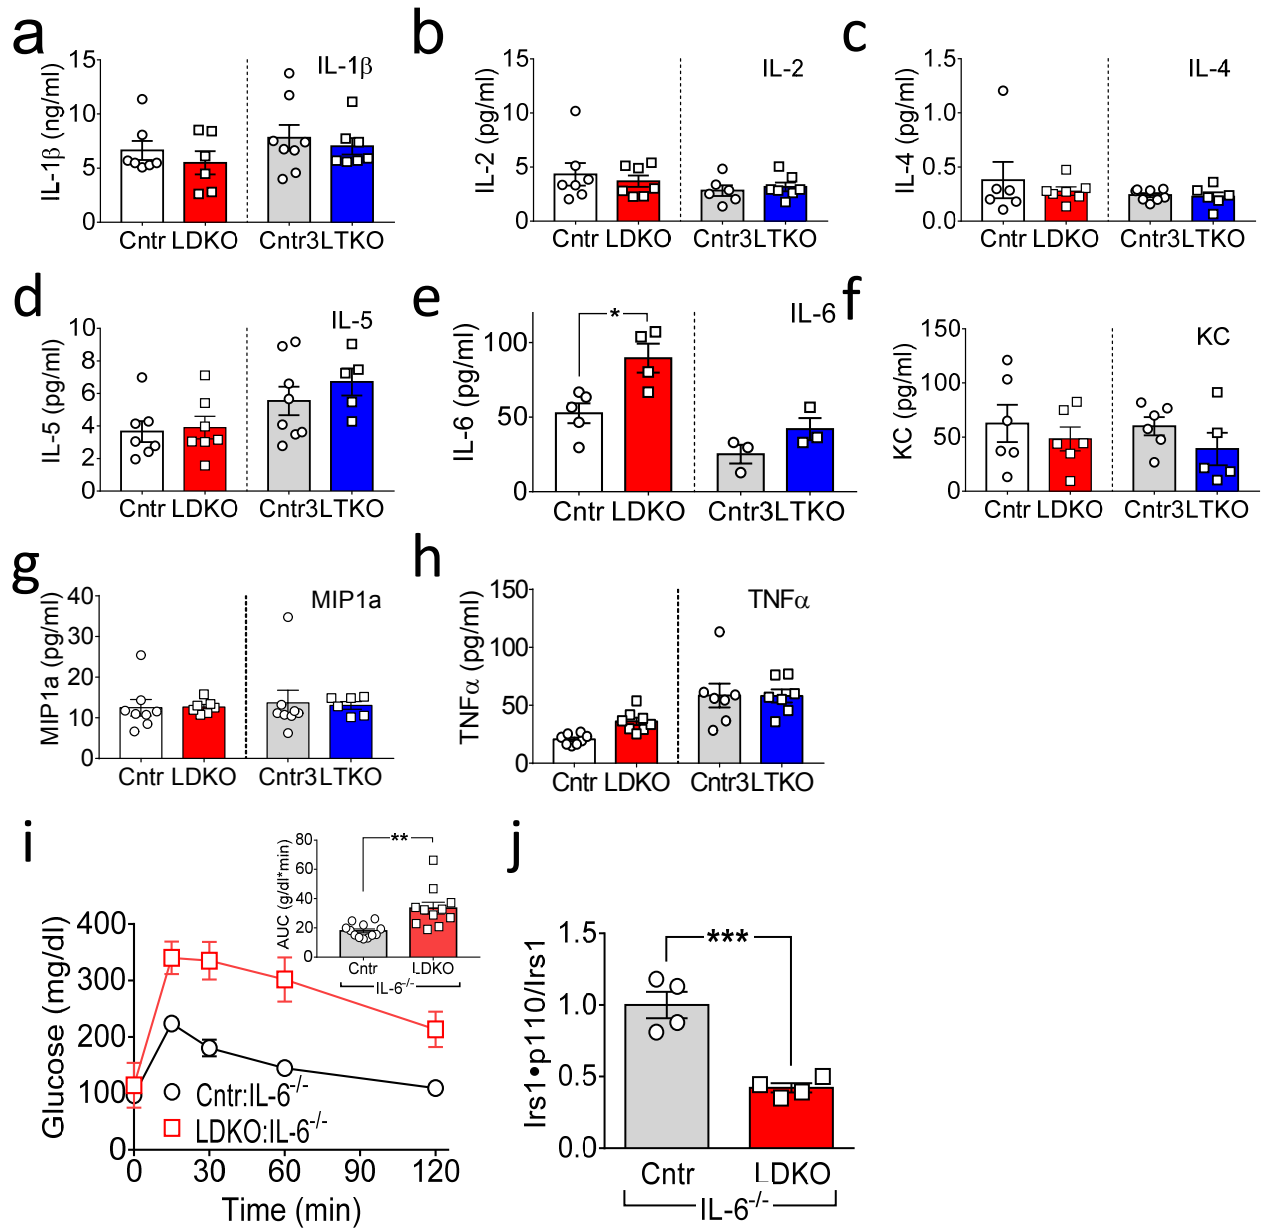

**Supplemental Fig. 3.** Related to Figure 2. Additional data concerning the role of IL6 in LDKO mice. **(a-h)** Measured concentrations of **(a)** IL1- $\beta$ , **(b)** IL-2, **(c)** IL-4, **(d)** IL-5, **(e)** IL-6, **(f)** KC, **(g)** MIP1a and **(h)** TNF $\alpha$  in serum of four-month old male LDKO and LTKO mice. **(i)** GTTs were performed in seven-month old LDKO•IL-6<sup>-/-</sup> and Cntr•IL-6<sup>-/-</sup> mice, and summarized by the AUC ( $n = 11-12$ ). **(j)** Insulin-stimulated Irs1•p110<sup>PI3K</sup> complex formation in the eWAT of seven-month old LDKO•IL-6<sup>-/-</sup> and Cntr•IL-6<sup>-/-</sup> mice ( $n = 4$ ). Data were analyzed by one-way ANOVA **(a-h)**, two-way ANOVA **(i)** and unpaired Student's t-test **(j)**. Data are reported as the mean $\pm$ SEM. \* $P < 0.05$ ; \*\* $P < 0.01$ ; \*\*\* $P < 0.001$ ; \*\*\*\* $P < 0.0001$ .

---

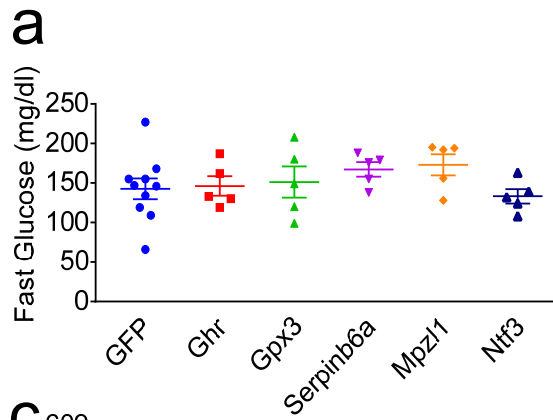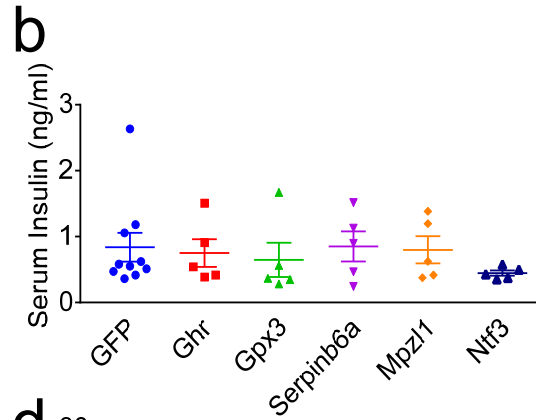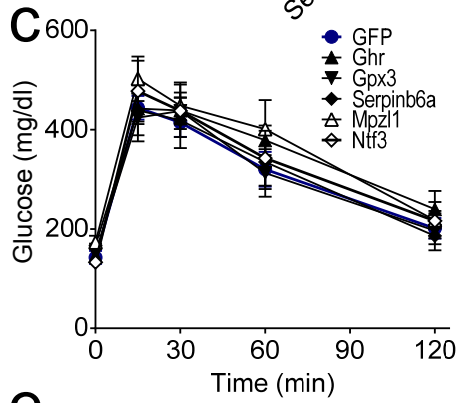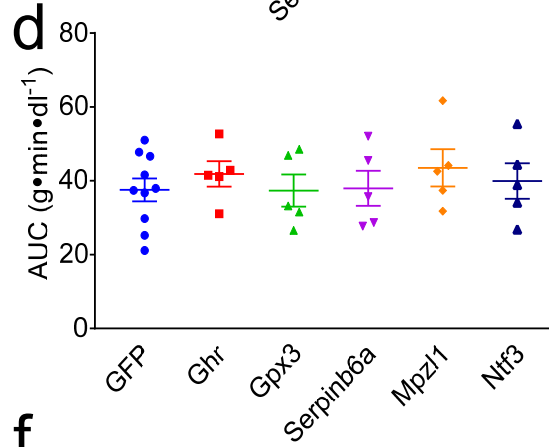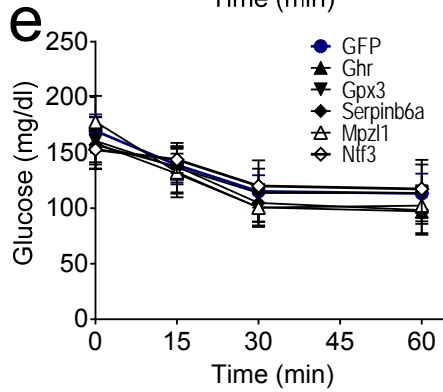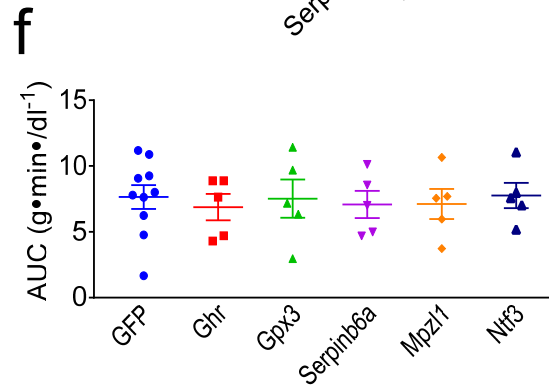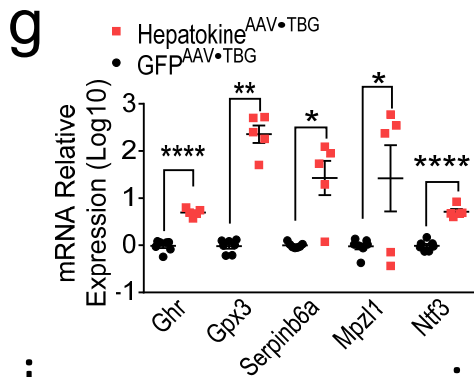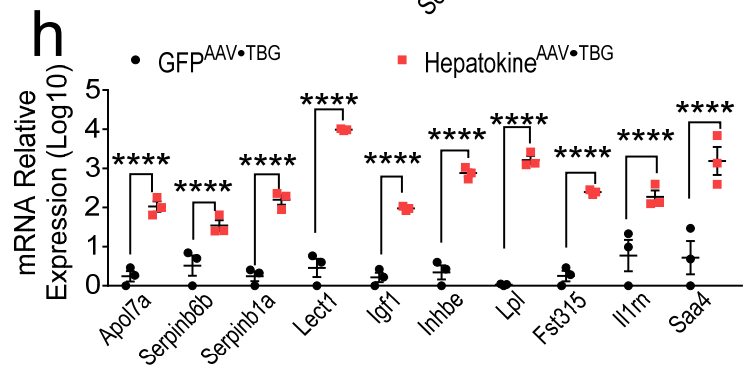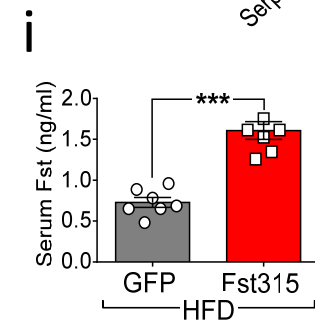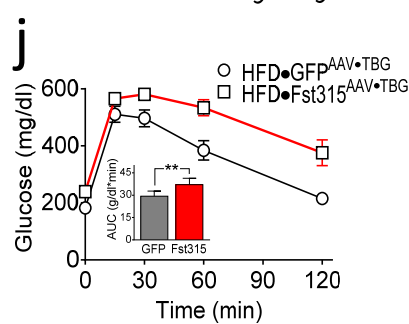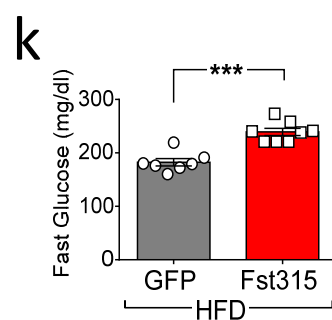

**Supplemental Fig. 4.** Related to Figure 2. Additional data from functional screening of putative hepatokines. Five-week old C57BL6 mice were challenged with high fat diet (45% fat) for 3 months and then infected with GFP<sup>AAV•TBG</sup> or hepatokine<sup>AAV•TBG</sup> ( $2 \times 10^{11}$  GC/mouse) encoding the indicated genes ( $n = 5-10$ ), four weeks after which (a) fasting blood glucose and (b) fasting serum insulin levels were measured. (c,d) GTTs were performed two weeks after AAV infection (c), summarized by the areas under curves (AUC) (d). (e,f) ITTs were performed four weeks after AAV infection (e), summarized by the areas under curves (AUC) (f). (g) Expression of hepatokine mRNAs assessed by qPCR on total liver RNA from hepatokine<sup>AAV•TBG</sup>- and GFP<sup>AAV•TBG</sup>-infected mice (cohort 1;  $n = 5-7$ ). (h) Expression of hepatokine mRNAs assessed by qPCR on total liver RNA from hepatokine<sup>AAV•TBG</sup>- and GFP<sup>AAV•TBG</sup>-infected mice (cohort 2;  $n = 3$ ). (i-k) Five-week old C57BL6 mice maintained on high fat diet (45% fat) for 2 months were infected with lower dose of GFP<sup>AAV•TBG</sup> or Fst315<sup>AAV•TBG</sup> ( $0.5 \times 10^{11}$  GC/mouse). Serum Fst was measured two weeks after infection (i) ( $n = 7$ ); GTTs (j) and fasting blood glucose levels (k) were performed 10 days after infection ( $n = 7-8$ ). Data were analyzed by one-way ANOVA (a, b, d, f), two-way ANOVA (c, e) and unpaired Student's t-test (g, h, i, j, k). Data are reported as the mean  $\pm$  SEM. \* $P < 0.05$ ; \*\* $P < 0.01$ ; \*\*\* $P < 0.001$ ; \*\*\*\* $P < 0.0001$ .

---



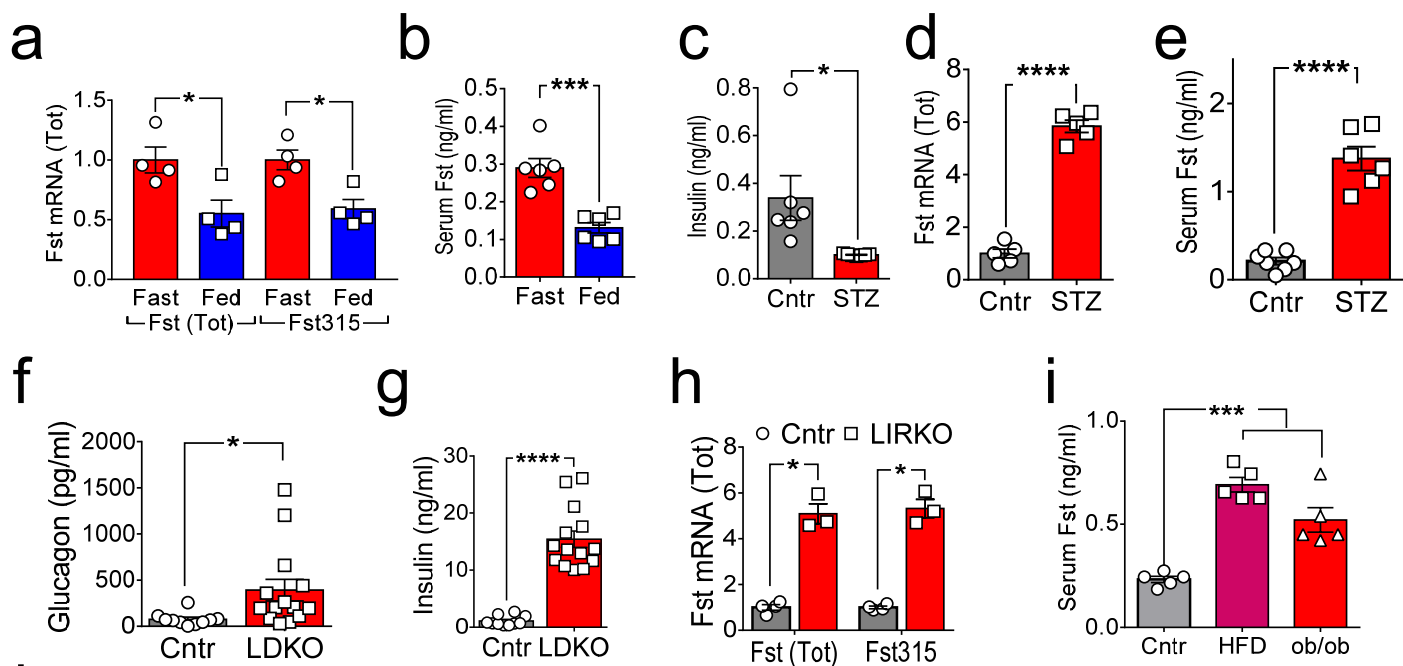

**j**

|              |       |                             |         |                          |       |
|--------------|-------|-----------------------------|---------|--------------------------|-------|
| <b>Human</b> | - 603 | GGGAGACCGGCCTGAGGTGTTAAACA  | TTTTTGT | TGGCTCCGACTAGTCCAGACGAA  | - 546 |
| <b>Mouse</b> | - 629 | GGGCGGCCGGCTCCGAGGTGTTAAACA | TTTTTGT | TGGCTTCTGACTTGTGGAGCCCGA | - 568 |
| <b>Rat</b>   | - 603 | GGGCGGCCGGCTCCGAGGTGTTAAACA | TTTTTGT | TGGCTTCTGACTTGTGGAGACCGA | - 572 |

  

|              |        |                               |                       |        |
|--------------|--------|-------------------------------|-----------------------|--------|
| <b>Human</b> | - 1614 | GAGAGACAGCGAGACAGAAACAGACAGAA | AATGATTCTGGAAAGATTAAG | - 1566 |
| <b>Mouse</b> | - 1660 | AACGGGCAGACAGACAGAAACAGACAAA  | AATGAATCTGGCAAGATTAAG | - 1618 |
| <b>Rat</b>   | - 1443 | GACAAACAGACAGACAGAAACAGACAAA  | AATGAATCTGGAAAGATTAAG | - 1395 |

  

|              |        |                         |                             |        |
|--------------|--------|-------------------------|-----------------------------|--------|
| <b>Human</b> | - 1895 | CTGCCATTAGAGGGCACTAAACA | AACTCTACATTAATGAGTTGGAGGGAA | - 1847 |
| <b>Mouse</b> | - 1874 | CTACCATTAGAGGGCACTAAACA | AACTCCACATTAATGCGTTGGAGGGAA | - 1826 |
| <b>Rat</b>   | - 1640 | CTACCATTAGAGGGCACTAAACA | AACTCCACATTAATGCGTTGGAGGGAA | - 1592 |

**Supplemental Fig. 5.** Related to Figure 3. Effect upon Fst expression and secretion of fasting/feeding, glucagon-to-insulin ratio, insulin insufficiency, and diet-induced or genetic obesity. **(a,b)** Hepatic Fst mRNA expression **(a)** and serum Fst concentration **(b)** in two-month old C57BL6 mice, with or without four hours refeeding after an overnight fast ( $n = 6$ ). **(c-e)** Two-month old C57BL6 mice were treated with streptozotocin (STZ, 150mg/kg i.p.), 10 days after which **(c)** serum insulin concentration, **(d)** hepatic Fst mRNA expression, and **(e)** serum Fst concentration were measured after overnight fasting ( $n = 5-7$ ). **(f,g)** Fasting serum glucagon **(f)** and insulin concentration **(g)** in 3-4-month old LDKO and Cntr mice ( $n = 10-14$ ). **(h)** Total and Fst315 mRNA expression in the liver of LIRKO and floxed control mice ( $n = 3-4$ ). **(i)** Serum total Fst concentration in four-month old high fat diet-fed mice (3 months HFD) and in 4-month old genetically obese *ob/ob* mice ( $n = 5$ ). **(j)** Conservation of consensus FoxO1 binding sites within the promoter region of human, mouse and rat Fst gene sequences. Data were analyzed by one-way ANOVA **(a, i)** and unpaired Student's t-test **(b, c, d, e, f, g, h)**. Data are reported as the mean $\pm$ SEM. \* $P < 0.05$ ; \*\* $P < 0.01$ ; \*\*\* $P < 0.001$ ; \*\*\*\* $P < 0.0001$ .

---

**a**

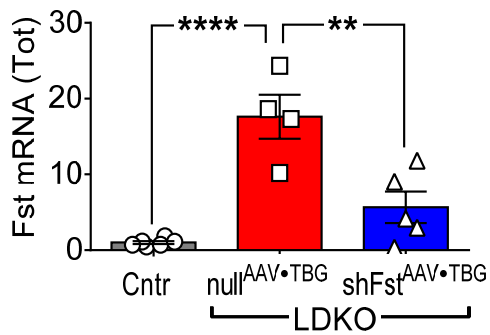

**b**

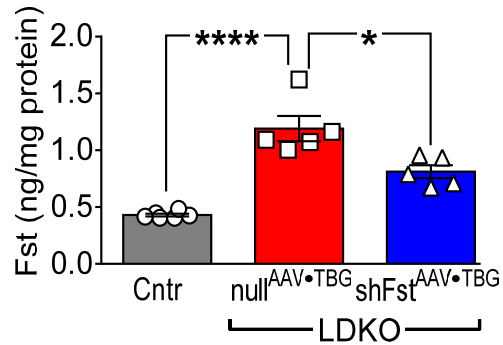

**c**

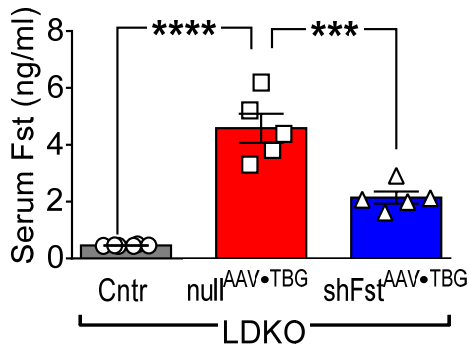

**d**

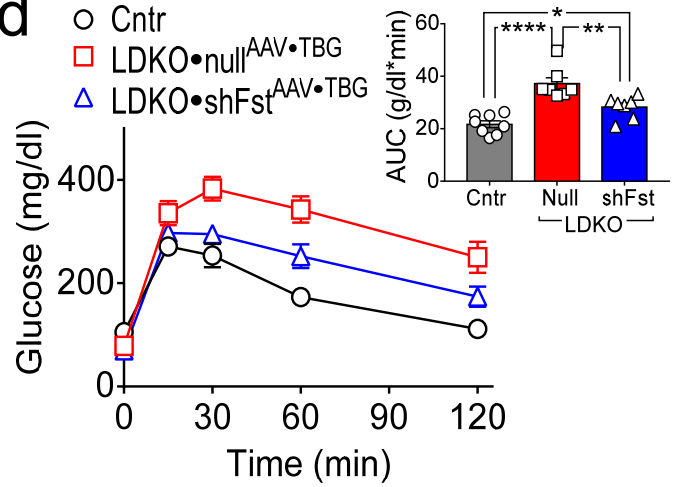

**e**

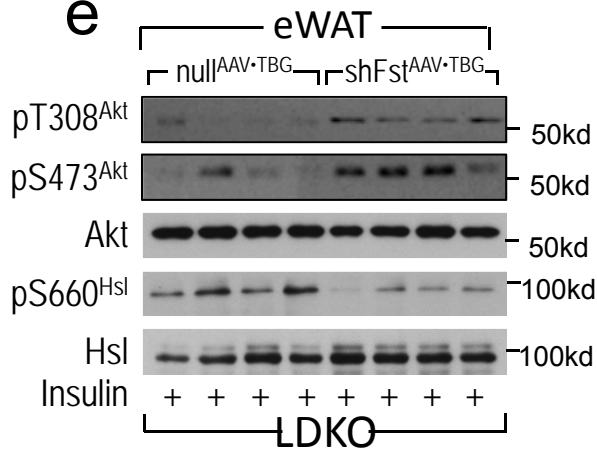

**f**

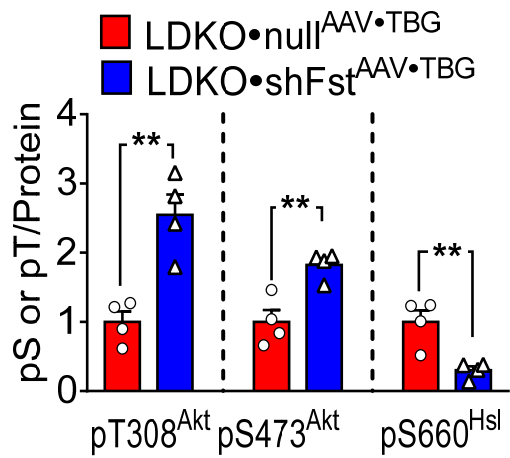

**Supplemental Fig. 6.** Related to Fig 4. Additional data on shFst<sup>AAV-TBG</sup>-mediated knockdown of hepatic Fst in LDKO mice. **(a,b)** Hepatic Fst mRNA expression **(a)** ( $n = 4-6$ ) and Fst protein content **(b)** ( $n = 5-6$ ) two weeks after infection of five-month old LDKO mice with shFst<sup>AAV-TBG</sup> or null<sup>AAV-TBG</sup>. **(c)** Serum total Fst concentration in the control and infected mice two weeks after infection ( $n = 5-6$ ). **(d)** Glucose tolerance of the infected mice measured one week after infection and summarized by the areas under curves ( $n = 7-8$ ). **(e,f)** Insulin-mediated regulation of Akt and HSL phosphorylation in eWAT was analyzed two weeks after infection by Western blotting **(e)** and quantitated by densitometry **(f)**. Data were analyzed by one-way ANOVA **(a, b, c, d)** and unpaired Student's t-test **(f)**. Data are reported as the mean $\pm$ SEM. \* $P < 0.05$ ; \*\* $P < 0.01$ ; \*\*\* $P < 0.001$ ; \*\*\*\* $P < 0.0001$ .

---

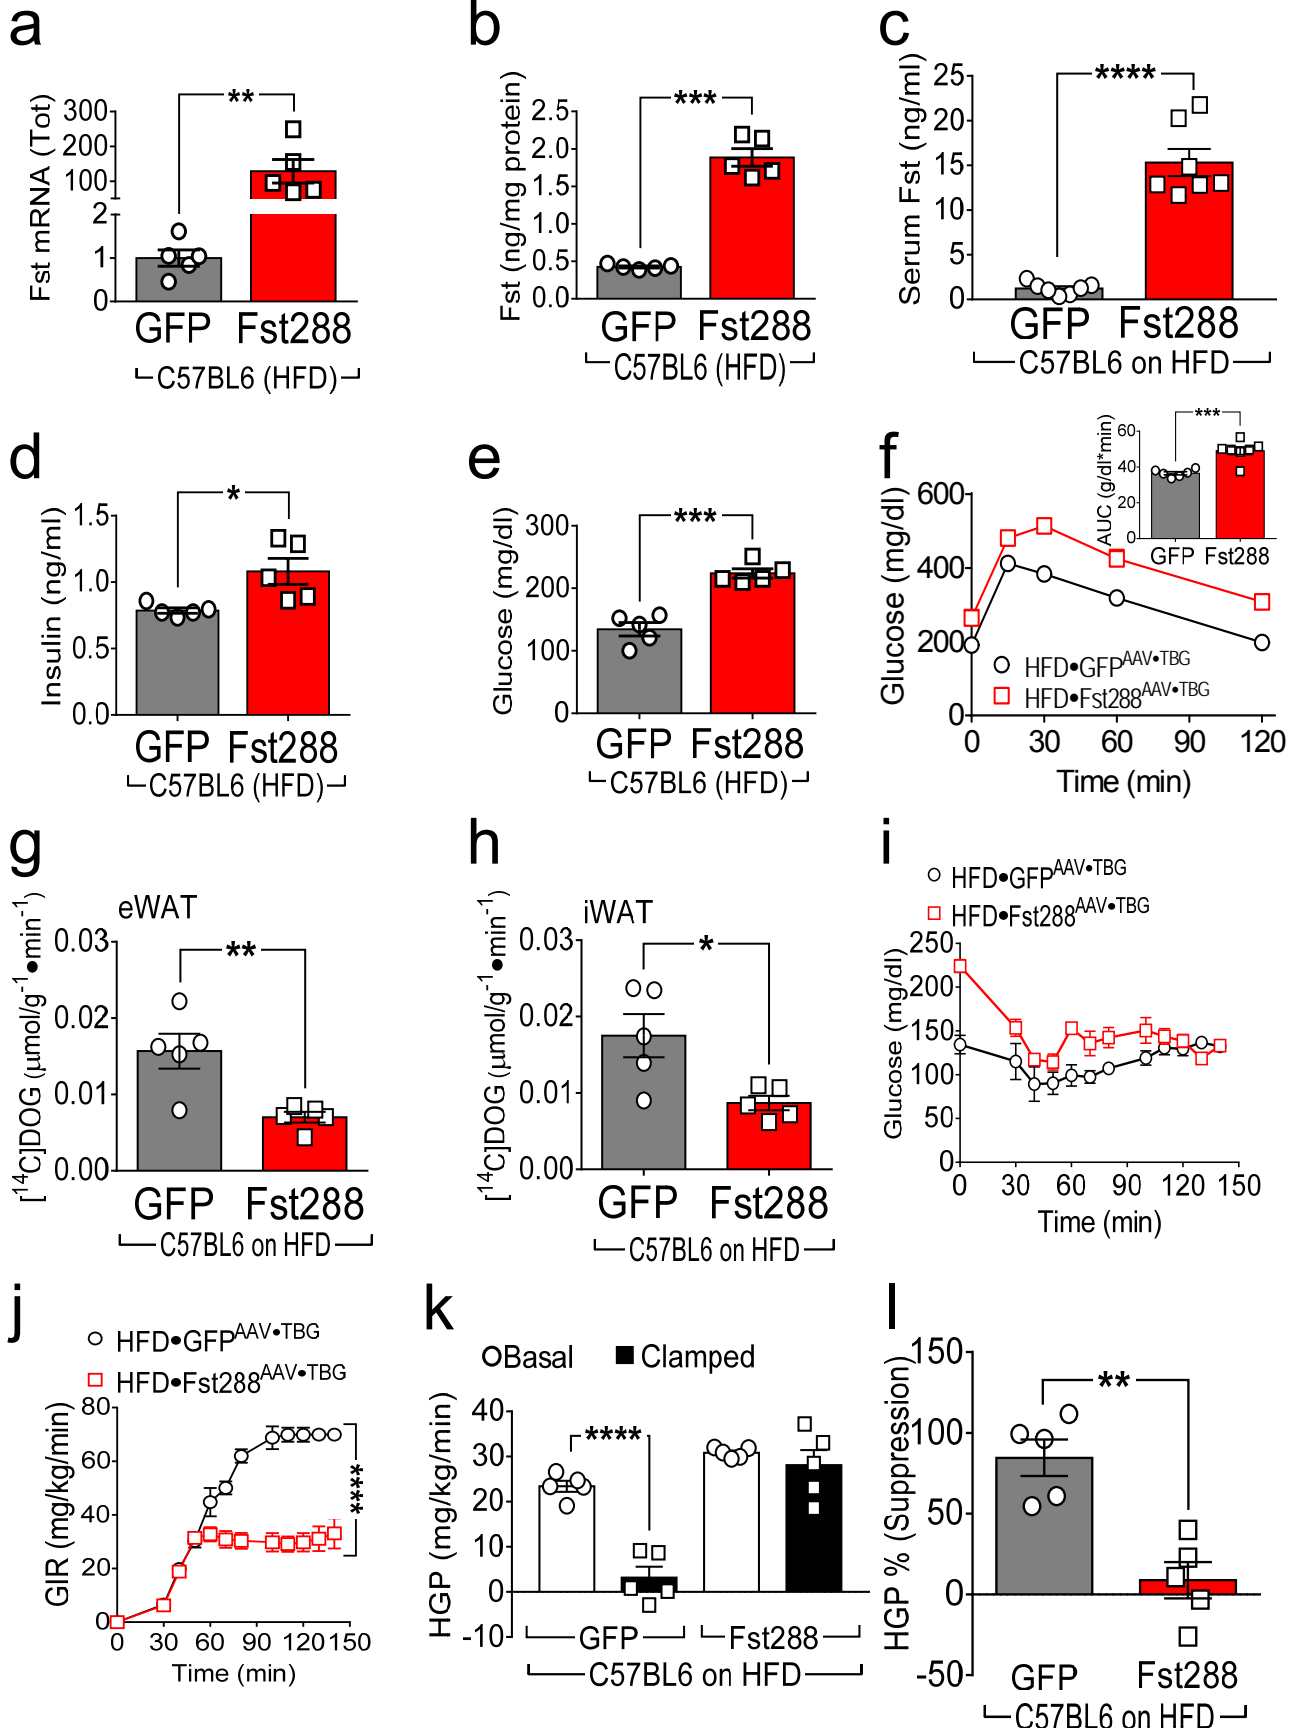

**Supplemental Fig. 7.** Related to Fig 5. Fst288 promotes WAT insulin resistance, hepatic glucose production, and glucose intolerance in C57BL6 mice. *Panels a-l:* C57BL6 mice challenged with high fat diet (45% fat) for 2 months were infected with Fst288<sup>AAV-TBG</sup> or GFP<sup>AAV-TBG</sup>. **(a,b)** Hepatic Fst mRNA expression **(a)** and protein levels **(b)** were measured four weeks after infection ( $n = 5$ ). **(c)** Serum total Fst concentration was measured one week after infection ( $n = 7$ ). **(d,e)** Fasting (5 h) plasma insulin **(d)** and glucose concentrations **(e)** were measured two weeks after infection ( $n = 5$ ). **(f)** Glucose tolerance of the infected mice was measured two weeks after infection and summarized by the areas under curves ( $n = 6-7$ ). **(g,h)** Hyperinsulinemic-euglycemic clamps were conducted four weeks after infection and uptake of 2DOG ([1-<sup>14</sup>C] 2-deoxy-D-glucose) tracer into **(g)** eWAT and **(h)** iWAT, was measured at the end of the clamp ( $n = 5$ ). **(i and j)** Blood glucose concentrations **(i)** and glucose infusion rates **(j)** before and at steady state during hyperinsulinemic-euglycemic clamp ( $n = 5$ ). **(k and l)** Basal and clamped hepatic glucose production **(k)** and calculated suppression of HGP by insulin during the clamp **(l)** ( $n = 5$ ). Data were analyzed by unpaired Student's t-test **(a, b, c, d, e, f, g, h, l)**, one-way ANOVA **(k)** and two-way ANOVA **(j)**. Data are reported as the mean $\pm$ SEM. \* $P < 0.05$ ; \*\* $P < 0.01$ ; \*\*\* $P < 0.001$ ; \*\*\*\* $P < 0.0001$ .

---

a

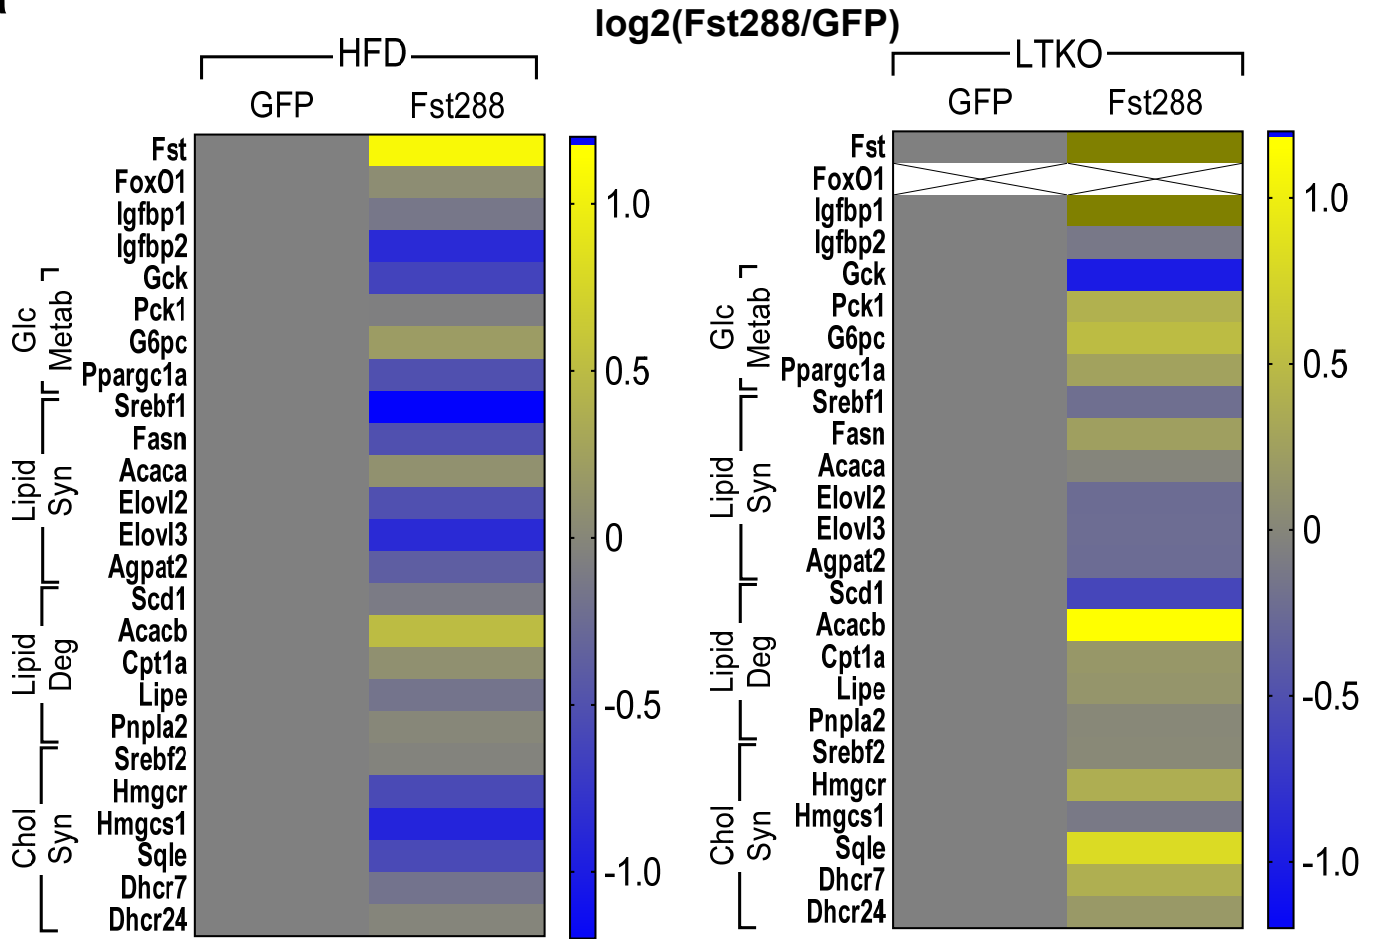

b

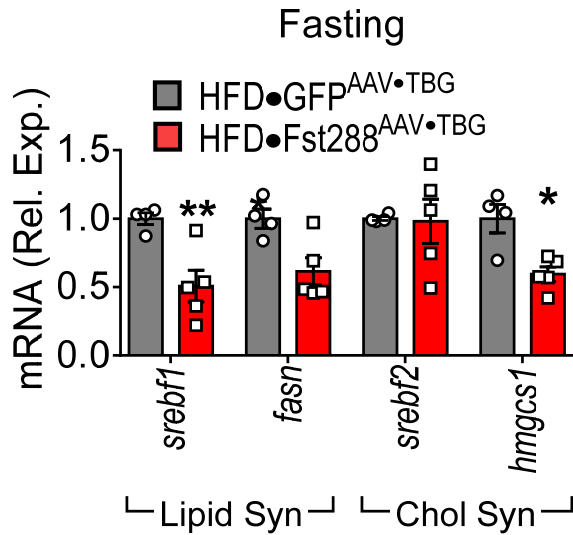

c

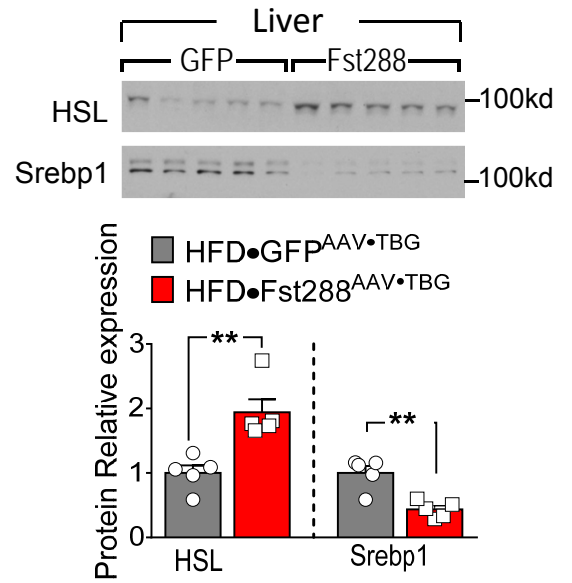

**Supplemental Fig. 8.** Related to Fig 6. **(a)** Expression of selected hepatic genes measured by Affymetrix array (Mo\_Gene 2.0) on liver RNA from wild-type C57BL6 mice maintained on high fat diet for 2 months ( $n = 3$ ) and from LTKO mice one week after infection with Fst288<sup>AAV·TBG</sup> or GFP<sup>AAV·TBG</sup> ( $n = 2$ ). **(b)** C57BL6J mice maintained on high fat diet (45% fat) for 2 months were infected with Fst288<sup>AAV·TBG</sup> or GFP<sup>AAV·TBG</sup> and mRNA expression was measured one week later (after a 16h overnight fast) by qPCR on total liver RNA. **(c)** Western blotting and densitometric quantitation of Srebp1 (long form) and HSL protein expression in liver of the mice in 'b' (For loading control see actinin blot, Fig. 6d). Data were analyzed by unpaired Student's t-test (**b, c**). Data are reported as the mean $\pm$ SEM. \* $P < 0.05$ ; \*\* $P < 0.01$ ; \*\*\* $P < 0.001$ ; \*\*\*\* $P < 0.0001$ .

---



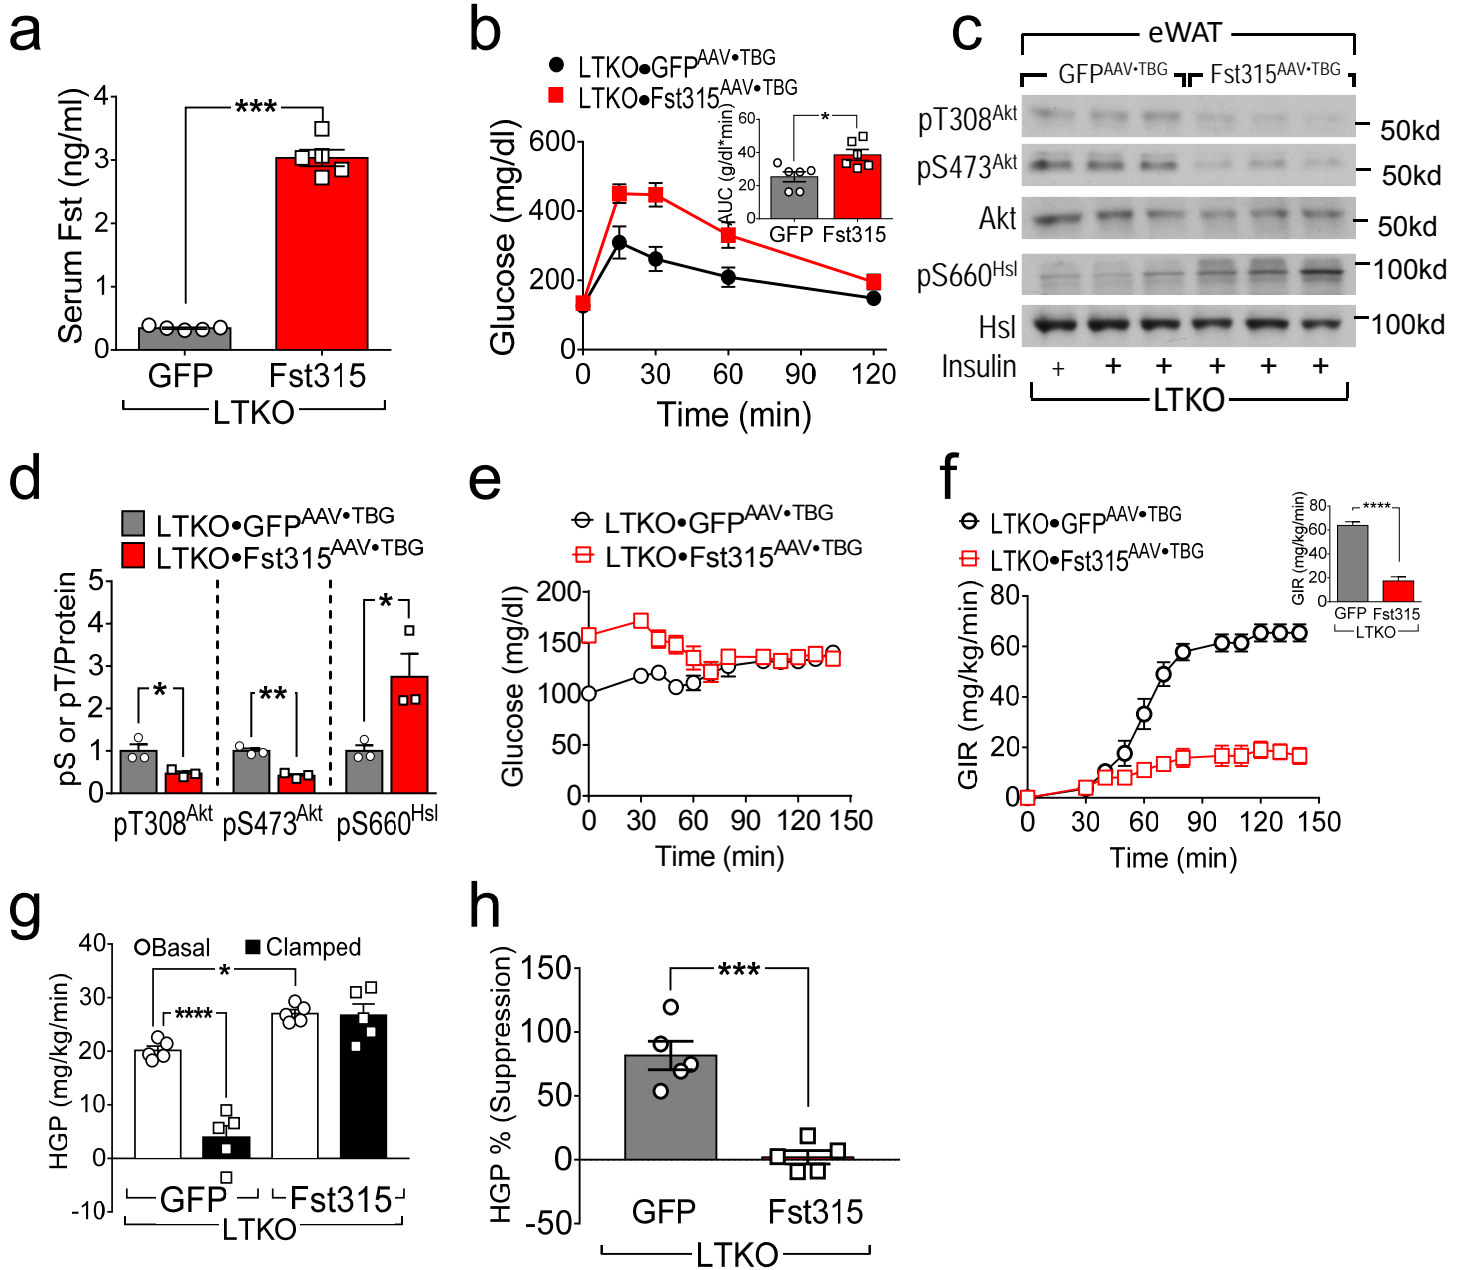

**Supplemental Fig. 9.** Related to Fig 6. Data from LTKO mice infected with Fst315<sup>AAV·TBG</sup> or GFP<sup>AAV·TBG</sup>. **(a)** Serum Fst concentration was measured two weeks after infection of LTKO mice with Fst315<sup>AAV·TBG</sup> or GFP<sup>AAV·TBG</sup> ( $n = 5$ ). **(b)** GTTs were performed two weeks after infection and summarized by the areas under curves ( $n = 6$ ). **(c,d)** Western blot analysis **(c)** and densitometric quantitation **(d)** of insulin-stimulated signaling (1 U/kg, i.v.) in eWAT three weeks after infection ( $n = 3$ ). **Panels e-h:** Hyperinsulinemic-euglycemic clamps were conducted four weeks after infection of LTKO mice with GFP<sup>AAV·TBG</sup> or Fst315<sup>AAV·TBG</sup>. **(e,f)** Blood glucose concentrations **(e)** and glucose infusion rates **(f)** before and at steady state during hyperinsulinemic-euglycemic clamp ( $n = 5$ ). **(g,h)** Basal and clamped hepatic glucose production **(g)** and calculated suppression of HGP by insulin during the clamp **(h)** ( $n = 5$ ). Data were analyzed by unpaired Student's t-test **(a, b, d, f, h)** and one-way ANOVA **(g)**. Data are reported as the mean $\pm$ SEM. \* $P < 0.05$ ; \*\* $P < 0.01$ ; \*\*\* $P < 0.001$ ; \*\*\*\* $P < 0.0001$ .

---

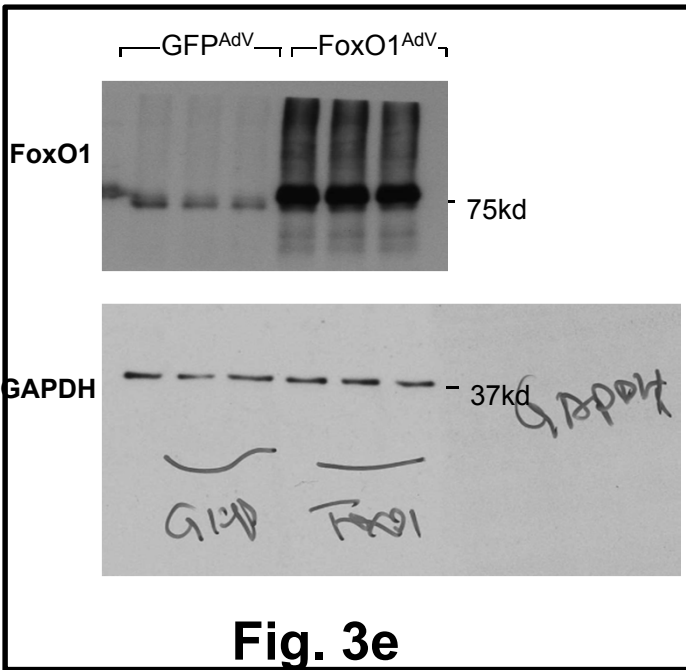

Fig. 3e

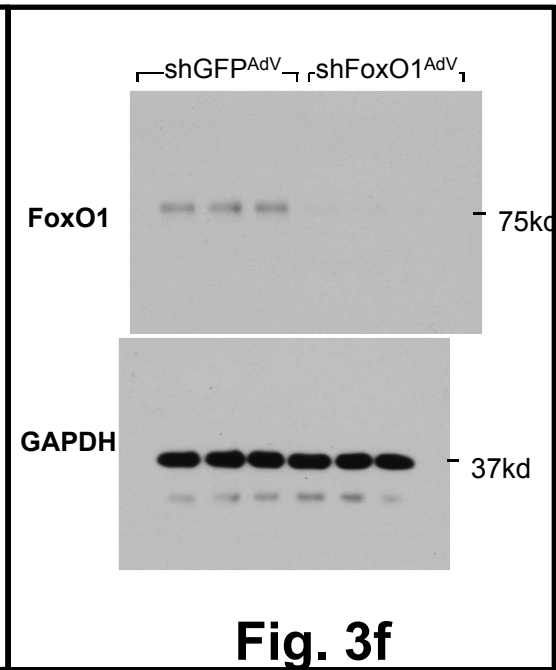

Fig. 3f

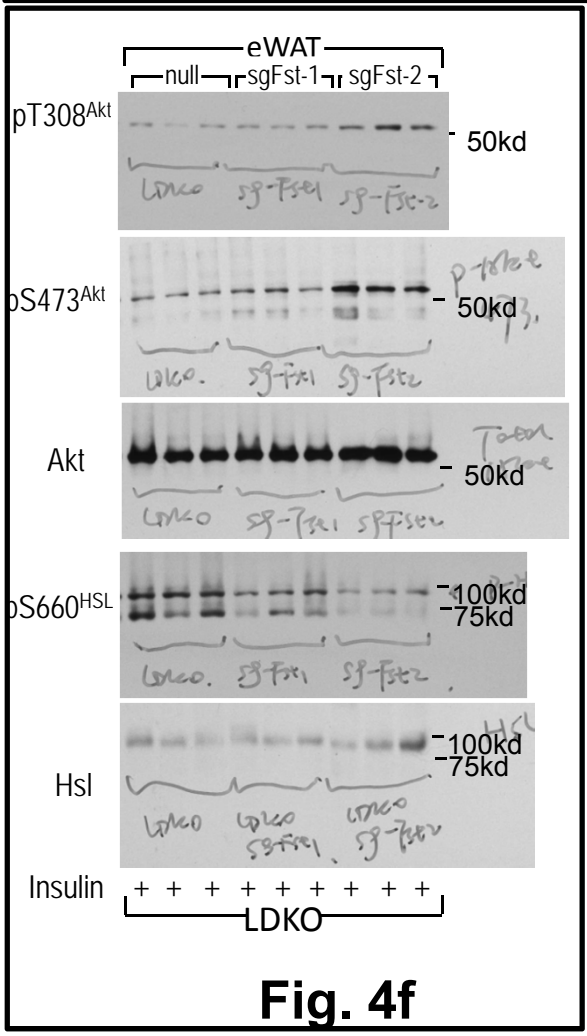

Fig. 4f

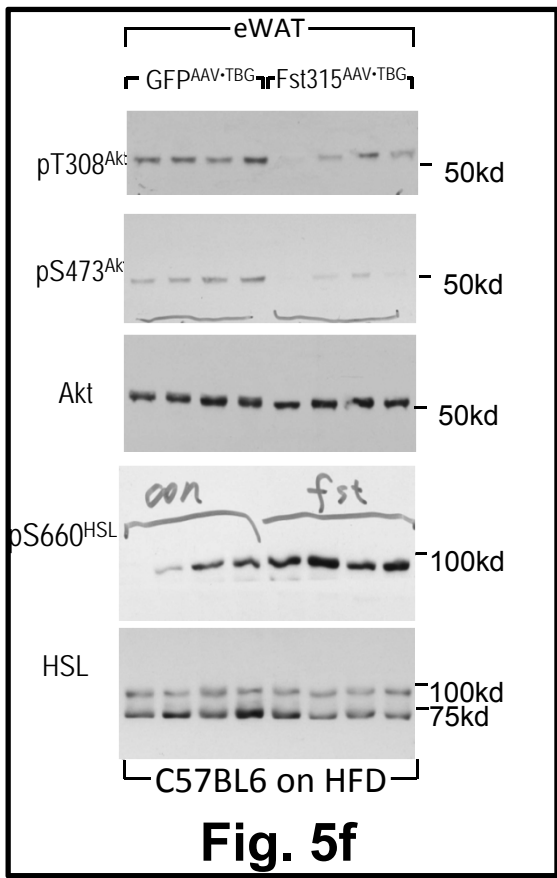

Fig. 5f

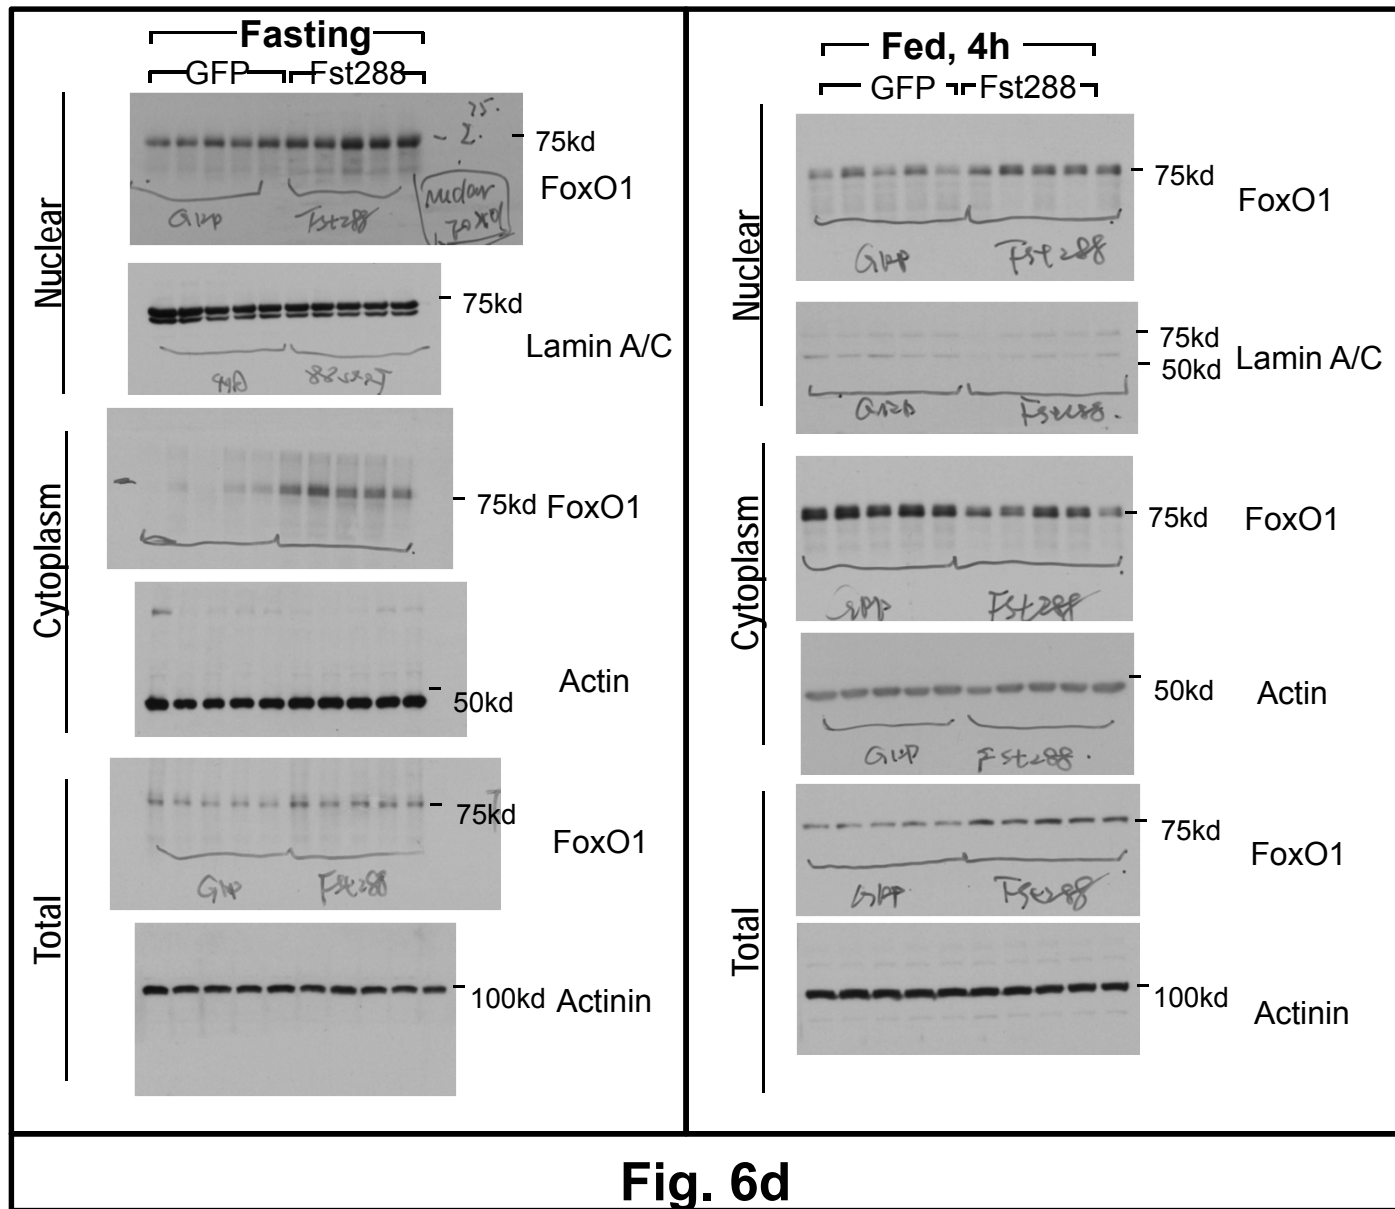

Supplemental Fig. 10b. Uncropped immunoblot pictures of main Figures.

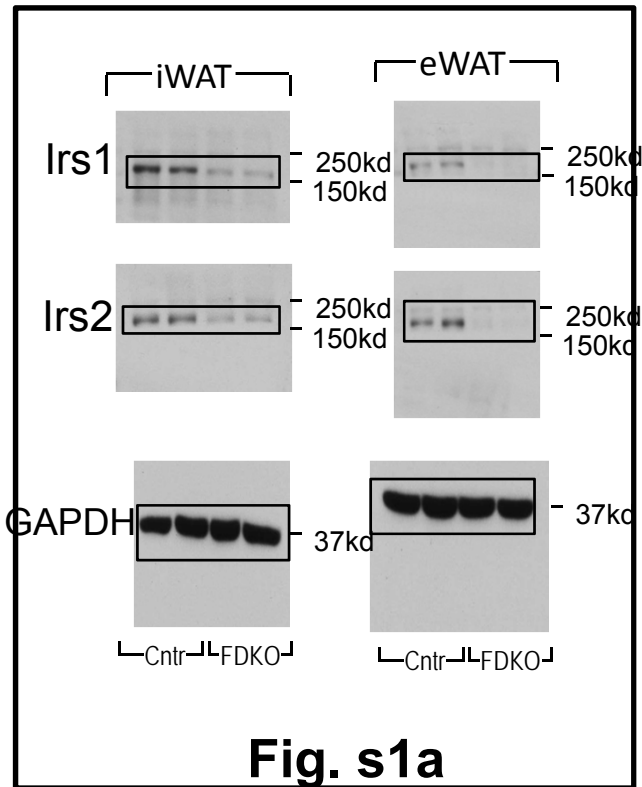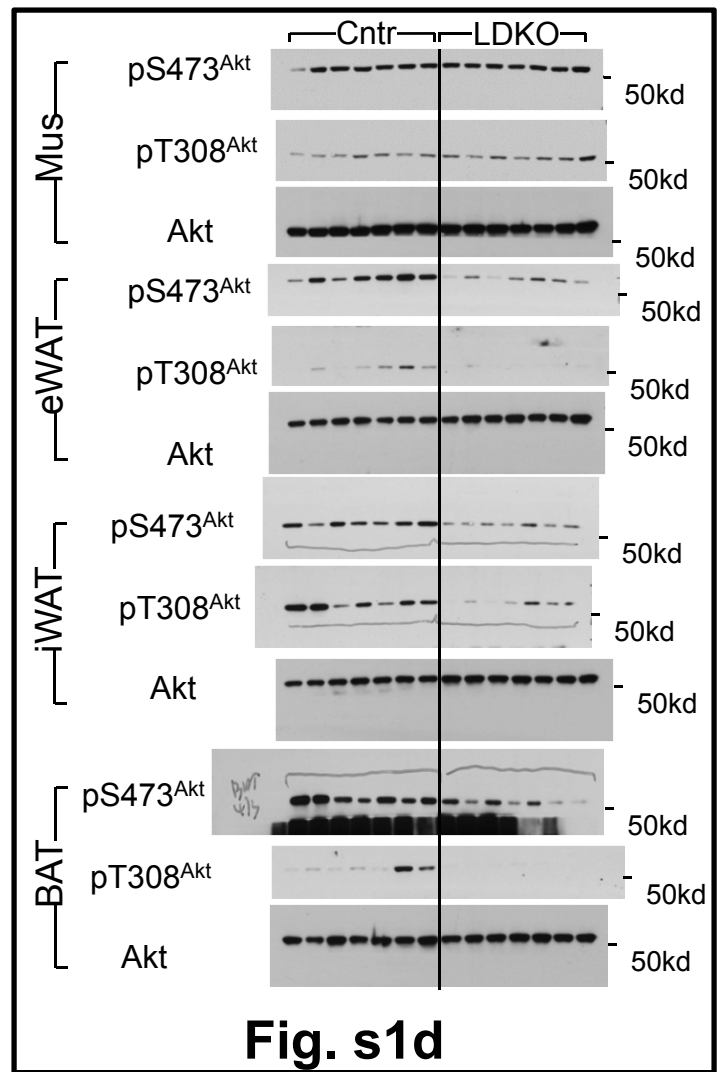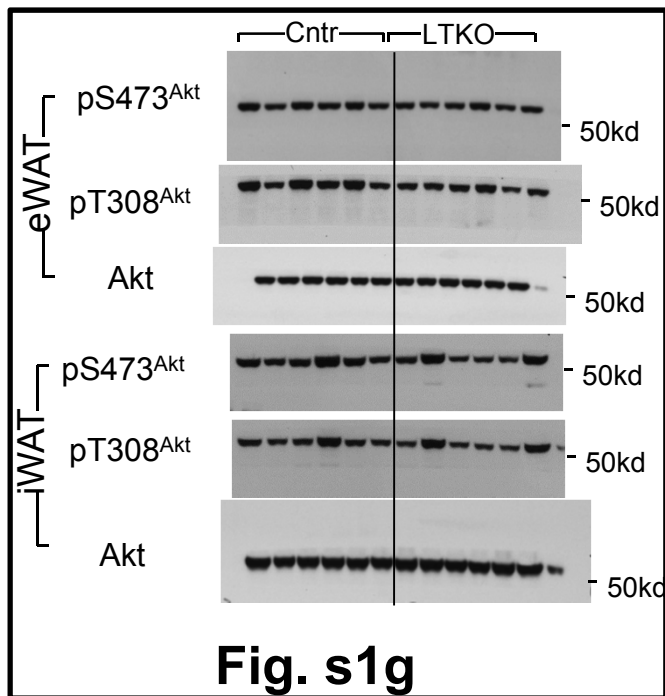

Supplemental Fig. 11a. Uncropped immunoblot pictures of supplementary Figures.

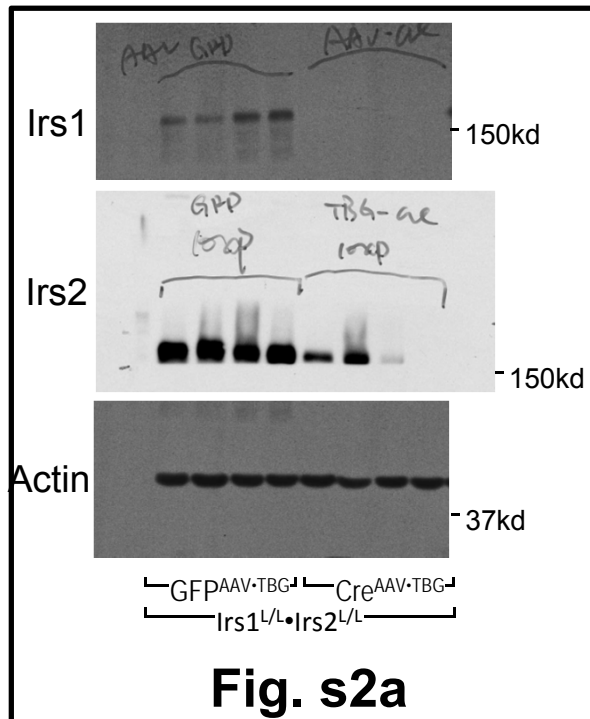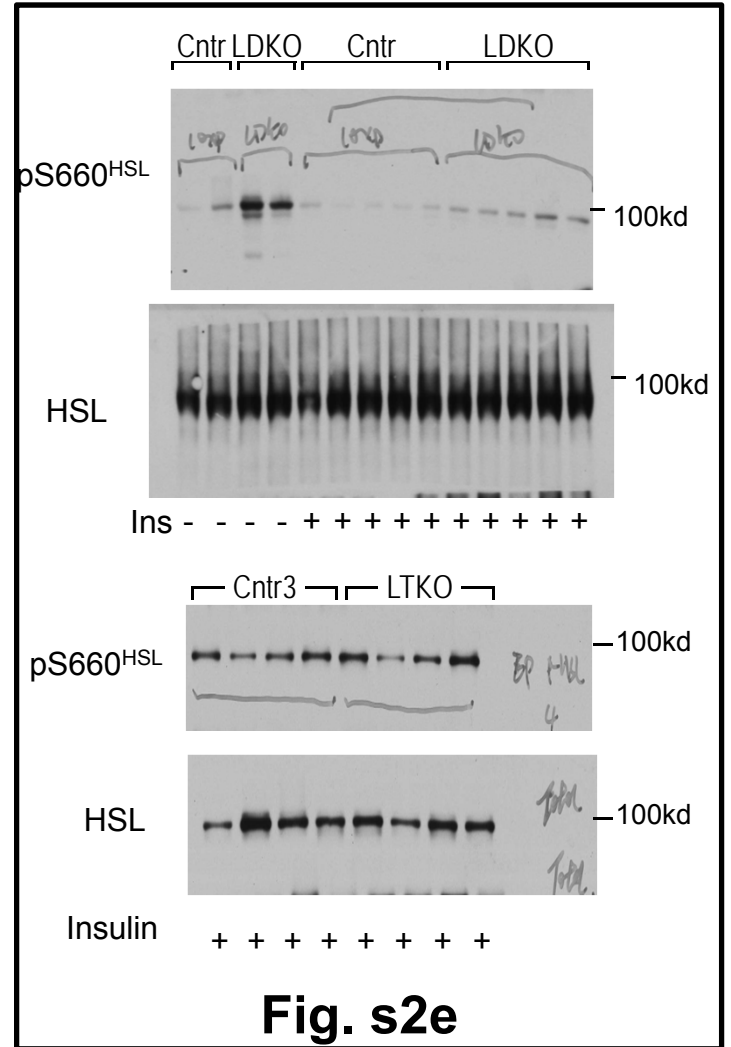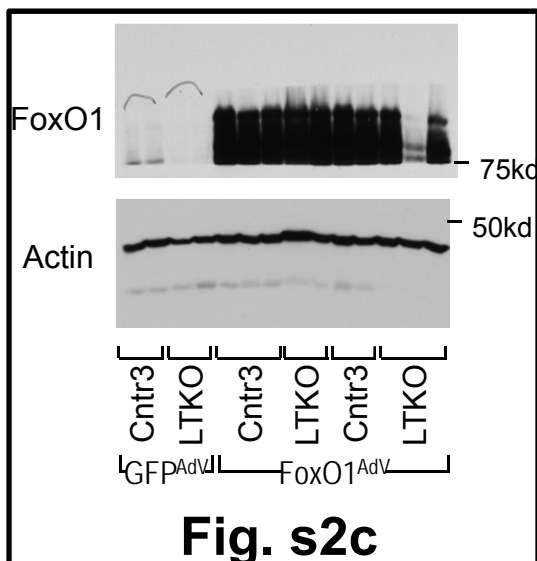

Supplemental Fig. 11b. Uncropped immunoblot pictures of supplementary Figures.

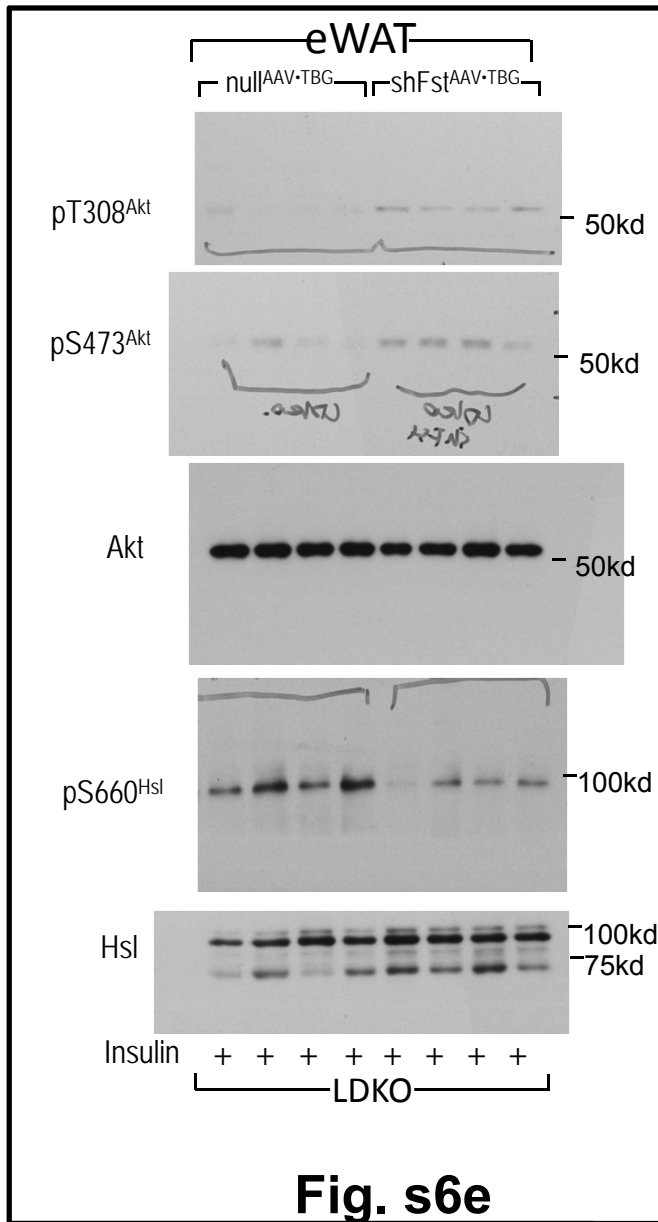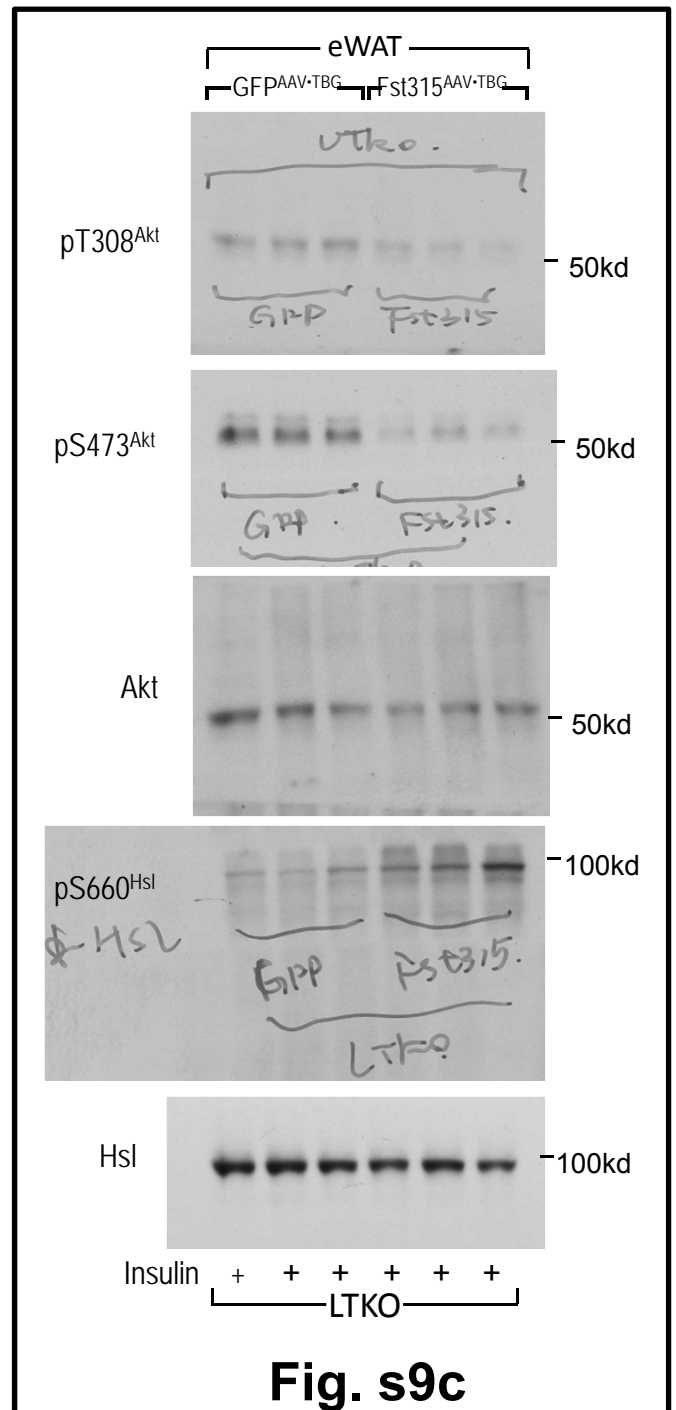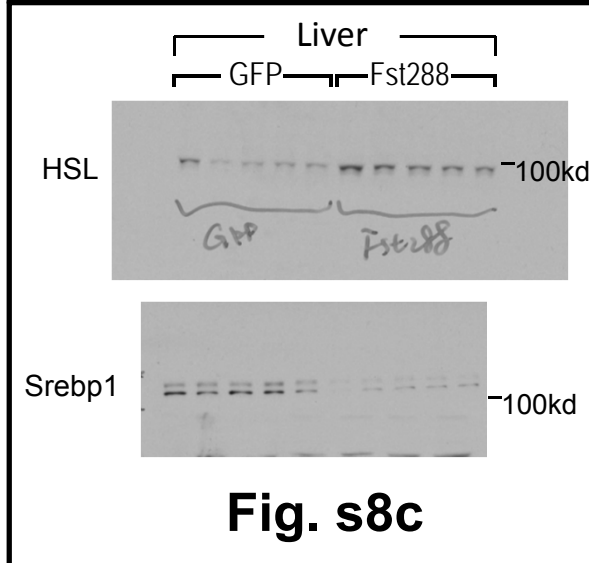

Supplemental Fig. 11c. Uncropped immunoblot pictures of supplementary Figures.

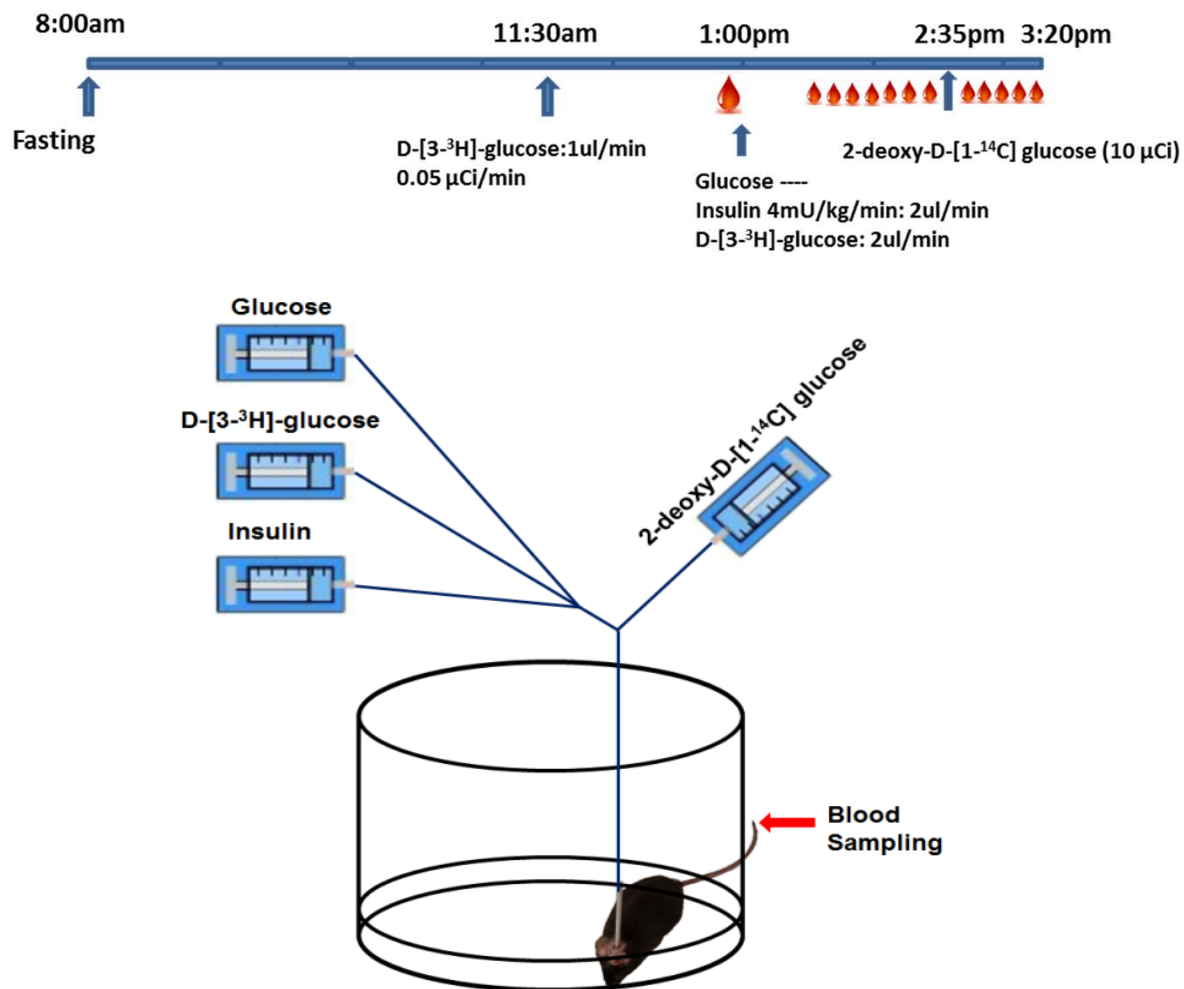

**Supplemental Fig. 12.** Hyperinsulinemic euglycemic clamp in conscious and unrestrained mice.



**Table S1.** Genes down-regulated (n=83) or upregulated (n=82) more than 2-fold in eWAT of LDKO-mice relative to Cntr-mice, determined by Affymetrix whole-gene hybridization microarray. Related to Fig S11.

| Gene Symbol | LDKO/Cntr (log2) | LTKO/Cntr3 (log2) | Gene Symbol | LDKO/Cntr (log2) | LTKO/Cntr3 (log2) |
|-------------|------------------|-------------------|-------------|------------------|-------------------|
| Zim1        | -3.750882        | -1.060452         | Agpat2      | 1.011359         | -0.211748         |
| Thbs2       | -3.341744        | -0.299111         | Als2cr12    | 1.015465         | -0.213349         |
| Irf4        | -2.665674        | -0.020737         | Me1         | 1.020324         | 0.04369           |
| Myh4        | -2.622508        | 8.7E-05           | Gm6936      | 1.021918         | 0.363874          |
| Vnn1        | -2.612773        | 0.02966           | Krt17       | 1.022862         | 0.007546          |
| Sgcg        | -2.508807        | -0.391135         | Slc2a4      | 1.032405         | -0.448542         |
| Gprn3       | -2.334664        | -0.021941         | Fam158a     | 1.038836         | -0.350579         |
| Peg3        | -2.281393        | -0.15645          | Igfals      | 1.03957          | -0.190863         |
| St6galnac5  | -2.073522        | -0.407297         | Anxa2       | 1.044121         | 0.198786          |
| Adap2       | -1.997105        | 0.13894           | Ndufb3      | 1.045308         | -0.02219          |
| Acsm3       | -1.956618        | -0.789405         | Igkv5-43    | 1.065802         | -0.020398         |
| Cmklr1      | -1.932594        | 0.351213          | Isoc1       | 1.070155         | 0.028488          |
| Fam134b     | -1.889569        | 0.628968          | Ces1f       | 1.083565         | -0.521765         |
| Mest        | -1.871339        | -0.30097          | Prkcb       | 1.092713         | -0.099269         |
| Fmo3        | -1.789893        | 0.087459          | Gm5478      | 1.097924         | 0.0013            |
| Sox7        | -1.732821        | -0.010626         | Hacl1       | 1.101691         | -0.117984         |
| Serpine1    | -1.685798        | 1.320124          | Frmd3       | 1.106228         | -0.19534          |
| Cd209g      | -1.679933        | -0.984515         | Orm1        | 1.112044         | 0.128644          |
| Acta1       | -1.524203        | 0.130079          | Tmem48      | 1.112212         | -0.053385         |
| Zbtb38      | -1.507172        | 0.349885          | Paqr9       | 1.113859         | 0.217467          |
| Zfp97       | -1.501514        | 0.1367            | Olfml1      | 1.122106         | -0.251061         |
| Ddit4       | -1.479044        | 0.235045          | Tmem45b     | 1.12837          | 0.037968          |
| Nr4a3       | -1.47829         | -0.018749         | Niacr1      | 1.129761         | -0.321957         |
| Cxx1c       | -1.449717        | -0.637689         | Olfr735     | 1.139459         | 0.438534          |
| Trp53inp1   | -1.408767        | -0.261547         | Scd2        | 1.141974         | 0.710061          |
| Sfrp5       | -1.376056        | 0.331588          | Rps13       | 1.142351         | 0.029374          |
| Cd209b      | -1.348736        | -0.678531         | Igh-VJ558   | 1.156482         | 0.119508          |
| Ifi205      | -1.33307         | -0.083752         | Arxes2      | 1.156819         | -0.343099         |
| Chst4       | -1.325169        | -0.629263         | Echdc1      | 1.168727         | 0.095472          |
| Gadd45g     | -1.297371        | -0.645331         | Gadd45a     | 1.174995         | -0.060268         |
| Usp54       | -1.292655        | 0.162856          | Smyd1       | 1.181049         | 0.229666          |
| Gm10851     | -1.289769        | 0.322124          | Lpgat1      | 1.194236         | 0.218342          |
| Ttn         | -1.28747         | -0.050697         | Pilrb2      | 1.19673          | -0.049056         |
| Scg3        | -1.27993         | 0.289235          | Gpd1        | 1.19771          | -8E-05            |
| Tnfrsf11b   | -1.274319        | 0.361824          | Mir708      | 1.208718         | -0.469499         |
| Hmgcs2      | -1.269165        | -0.294503         | Psat1       | 1.216498         | -0.404853         |
| Scara5      | -1.244959        | -0.241542         | Aldh3b2     | 1.221689         | -0.283578         |

| Gene Symbol | LDKO/Cntr (log2) | LTKO/Cntr3 (log2) | Gene Symbol | LDKO/Cntr (log2) | LTKO/Cntr3 (log2) |
|-------------|------------------|-------------------|-------------|------------------|-------------------|
| Gm765       | -1.229286        | -0.140589         | Cdkn2c      | 1.222999         | -0.280405         |
| Upk3b       | -1.215553        | -0.18891          | Igh-VJ558   | 1.22309          | -0.993101         |
| Pmepa1      | -1.213588        | 0.063275          | Ighg        | 1.226966         | 0.389438          |
| Muc16       | -1.185351        | -0.178132         | Insig1      | 1.23774          | 0.135081          |
| Tat         | -1.183446        | 1.38603           | Tmem182     | 1.25233          | -0.02209          |
| Eif4ebp3    | -1.180897        | -0.444907         | Aqp11       | 1.254241         | 0.418556          |
| Hspb7       | -1.180063        | 0.071223          | Gm4871      | 1.263588         | 0.445477          |
| Sult1d1     | -1.178718        | 1.633916          | Ranbp3l     | 1.2676           | 0.32603           |
| Errfi1      | -1.167395        | 0.164898          | Rab9b       | 1.288028         | -0.036487         |
| Chchd10     | -1.16603         | -0.460054         | Krt79       | 1.288732         | 0.398722          |
| Folr2       | -1.16338         | -0.449826         | Gm4981      | 1.28999          | -0.256478         |
| Cyp2d22     | -1.155034        | -0.1382           | Zdhhc2      | 1.290149         | -0.145371         |
| Pnpla7      | -1.14804         | -0.088138         | Thrsp       | 1.293625         | -0.265227         |
| Stoml3      | -1.136987        | 1.670174          | Slc25a35    | 1.295351         | -0.270091         |
| Sdc4        | -1.133649        | 0.43363           | Gys2        | 1.297301         | -0.943828         |
| Fbxo31      | -1.13251         | -0.174988         | Tpi1        | 1.320515         | 0.130083          |
| Thbs1       | -1.128532        | 0.005496          | Steap4      | 1.347646         | -0.205538         |
| Npc1        | -1.123717        | -0.454949         | Hgf         | 1.359002         | -0.473704         |
| Acot4       | -1.119273        | 0.000398          | Bmp3        | 1.409767         | -0.05818          |
| Mirlet7f-1  | -1.11543         | -0.35102          | Odz4        | 1.417978         | -0.218266         |
| Clmn        | -1.112631        | 0.125017          | Cidea       | 1.463163         | -0.291937         |
| Sema3e      | -1.087111        | 0.082412          | Angpt1      | 1.472583         | -0.322284         |
| Atp2a1      | -1.083525        | -0.373867         | Fasn        | 1.475002         | 0.0772            |
| Nova1       | -1.080522        | -0.211836         | Adam12      | 1.515543         | -0.127497         |
| Mir32       | -1.073457        | 0.05281           | Ifi27l2a    | 1.527095         | -0.211772         |
| Snord37     | -1.06746         | 0.038432          | Cycs        | 1.593572         | 0.292203          |
| Plcl2       | -1.066159        | 0.13596           | Fabp5       | 1.619399         | -0.650746         |
| Gpr133      | -1.063816        | -0.705936         | Fgf13       | 1.697856         | 0.249057          |
| Arrdc3      | -1.061551        | 0.32479           | Chi3l3      | 1.698056         | -0.202853         |
| Tle3        | -1.061188        | 0.192375          | Obfc2a      | 1.738146         | -0.433351         |
| Pcsk6       | -1.060444        | -0.190266         | Gpt         | 1.738472         | 0.09216           |
| Gfpt2       | -1.060165        | -0.435801         | Col15a1     | 1.776894         | -0.132135         |
| Il6ra       | -1.05944         | -0.124717         | Igkv15-103  | 1.834551         | 0.643843          |
| Mir103-2    | -1.058341        | -0.246584         | Lctl        | 1.871293         | 0.138932          |
| Ifnz        | -1.049604        | 0.430439          | Pnpla3      | 1.920606         | -0.38938          |
| Gm11827     | -1.035381        | -0.083388         | Ncam2       | 1.954447         | 0.406999          |
| Adrb2       | -1.034939        | -0.111871         | Arxes1      | 1.983407         | -0.003941         |
| Fcna        | -1.02841         | -0.668016         | Lrrc39      | 2.01118          | -0.132343         |
| Slc7a8      | -1.02199         | -0.402419         | Sycp3       | 2.042756         | -0.391121         |
| Cmah        | -1.019949        | -0.132184         | Aldh1a7     | 2.058233         | -0.174981         |

| Gene Symbol | LDKO/Cntr (log2) | LTKO/Cntr3 (log2) | Gene Symbol | LDKO/Cntr (log2) | LTKO/Cntr3 (log2) |
|-------------|------------------|-------------------|-------------|------------------|-------------------|
| Ms4a4a      | -1.009563        | 0.009008          | Slc25a10    | 2.069263         | -0.090003         |
| Pla1a       | -1.005094        | -0.568851         | Ear11       | 2.110067         | 0.716328          |
| Cuzd1       | -1.004164        | 0.898065          | Serpina3b   | 2.192778         | 0.499345          |
| Defb7       | -1.002875        | 0.212596          | Igh-VJ558   | 2.248472         | 0.282009          |
| Apol9b      | -1.000961        | -1.690716         | Gpr81       | 2.480955         | -0.551443         |
|             |                  |                   | Cyp2f2      | 2.835013         | 1.073235          |

**Table S2.** Obese diabetic individuals' data. Related to Fig 4H-I.

| Sex    | Study Group | BMI BL | BMI 6 mo | %HbA1c BL | %HbA1c 6 mo | FBG BL | FBG 6 mo | Fst BL | Fst 6 mo |
|--------|-------------|--------|----------|-----------|-------------|--------|----------|--------|----------|
| Male   | Diabetic    | 37     | 32       | 9.7       | 8.0         | 162    | 122      | 2.32   | 1.33     |
| Female | Diabetic    | 52     | 38       | 9.2       | 6.1         | 172    | 108      | 1.02   | 0.58     |
| Female | Diabetic    | 43     | 27       | 8.5       | 5.4         | 128    | 89       | 1.47   | 0.75     |
| Female | Diabetic    | 51     | 32       | 7.0       | 5.2         | 83     | 82       | 1.31   | 1.14     |
| Male   | Diabetic    | 27     | 32       | 9.8       | 7.4         | 182    | 174      | 1.31   | 1.20     |
| Female | Diabetic    | 60     | 29       | 7.7       | 5.5         | 135    | 88       | 1.10   | 0.97     |
| Female | Diabetic    | 40     | 30       | 9.5       | 6.6         | 198    | 134      | 4.31   | 1.14     |
| Female | Diabetic    | 51     | 36       | 6.6       | 5.1         | 130    | 96       | 2.01   | 0.70     |
| Female | Diabetic    | 47     | 34       | 7.2       | 5.1         | 217    | 123      | 1.10   | 0.43     |

BMI: Body Mass Index, weight in kilograms divided by the square of height in meters. BL: Baseline before the surgery. 6 mo: 6 months after surgery. HbA1c: hemoglobin A1c. FBG: fasting blood glucose (mg/dl). Fst: Serum follistatin level (ng/ml).

**Table S3. Materials**

| REAGENT or RESOURCE                       | SOURCE                     | IDENTIFIER      |
|-------------------------------------------|----------------------------|-----------------|
| <b>Antibodies</b>                         |                            |                 |
| Phospho-Akt (Ser473)                      | Cell Signaling Technology  | CST#4058        |
| Phospho-Akt (Thr308)                      | Cell Signaling Technology  | CST #4056       |
| Akt                                       | Cell Signaling Technology  | CST #9272       |
| Phospho-HSL (Ser660)                      | Cell Signaling Technology  | CST #4126       |
| HSL                                       | Cell Signaling Technology  | CST #4107       |
| FoxO1                                     | Cell Signaling Technology  | CST #2880       |
| $\beta$ -Actin                            | Cell Signaling Technology  | CST #4967       |
| Phospho-Smad2 (Ser465/467)                | Cell Signaling Technology  | CST #3101       |
| Smad2 (D43B4)                             | Cell Signaling Technology  | CST #5339       |
| GAPDH (D16H11)                            | Cell Signaling Technology  | CST #5174       |
| Lamin A/C                                 | Cell Signaling Technology  | CST #2032       |
| Actinin                                   | Santa Cruz Biotechnology   | SC-15335        |
| Irs1 mouse polyclonal                     | Produced in our laboratory |                 |
| Irs2 mouse polyclonal                     | Produced in our laboratory |                 |
| Srebp1                                    | Abcam                      | #3259           |
| Prolong Antifade Gold with DAPI           | Life Technologies          | #1652731        |
| Fst primary antibodies for immunostaining | Abcam                      | #203131         |
| Fst primary antibodies for cell culture   | R&D Systems                | #AF669 (Fig 5a) |
| Goat anti-rabbit secondary antibody       | Molecular Probes           | #A11012         |
| <b>Chemicals</b>                          |                            |                 |
| D-[3-3H]-glucose                          | PerkinElmer                | NET331C005MC    |
| Recombinant human insulin                 | Eli Lilly                  | #HI-210         |
| Bovine Serum Albumin (Fatty acid-free)    | Sigma Aldrich              | #A8806          |
| 2-deoxy-D-[1-14C] glucose                 | PerkinElmer                | NEC495A001MC    |
| Barium hydroxide solution                 | Sigma Aldrich              | #B4059          |
| Zinc sulfate solution                     | Sigma Aldrich              | #Z2876          |
| 3-Isobutyl-1-methylxanthine               | Sigma Aldrich              | #I5879          |
| Streptozocin                              | Sigma Aldrich              | #S1030          |

| <b>Experimental Models:<br/>Organisms/Strains</b>           | <b>SOURCE</b>                 | <b>IDENTIFIER</b> |
|-------------------------------------------------------------|-------------------------------|-------------------|
| C57BL6 mice                                                 | The Jackson Laboratory        | #000664           |
| Ob/ob mice                                                  | <b>The Jackson Laboratory</b> | #000632           |
| B6;FVB-Tg(Adipoq-cre)1Evdr/J                                | <b>The Jackson Laboratory</b> | #010803           |
| Irs1-flox                                                   | Generated in our laboratory   |                   |
| Irs2-flox                                                   | Generated in our laboratory   |                   |
| FoxO1-flox                                                  | From Ronald DePinho's lab     |                   |
| B6.129S2-Ilf6 <sup>tm1Kopf</sup> /J                         | The Jackson Laboratory        | #002650           |
| <b>Experimental Models: Cell Lines</b>                      |                               |                   |
| 3T3-L1 adipocyte                                            | Evan Rosen's lab              |                   |
| HEK293                                                      | ATCC                          | CRL-1573          |
| <b>Recombinant DNA</b>                                      |                               |                   |
| pShuttle-IRES-hrGFP-2 vector                                | Agilent                       | #240082           |
| pAdEasy vector                                              | Agilent                       | #240005           |
| pENTR/U6 vector                                             | Life Technologies             | #45-0511          |
| pAd/BLOCK-iT vectors                                        | Life Technologies             | #V49220           |
| Paav2 backbone LSP with promega intron vector               | Dr. Umut Ozcan's lab          |                   |
| AAV8.TBG.PI.eGFP (AAV-GFP)                                  | Penn Vector Core              | #cs0397dl         |
| AAV8.TBG.PI.Cre (AAV-Cre)                                   | Penn Vector Core              | #cs0725-dl        |
| pX602-AAV-TBG::NLS-SaCas9-NLS-HA-OLLAS-bGHpA;U6::Bsal-sgRNA | Addgene                       | #61593            |
| <b>Software</b>                                             |                               |                   |
| Alpha Innotech FluorChem 5500                               |                               |                   |
| GraphPad Prism 7                                            |                               |                   |
